# Supplementary material
Source: PubMed Central journal article supplement (PMC9050588)
Supplement: 41366_2021_1054_MOESM4_ESM.pdf [file 41366_2021_1054_MOESM4_ESM.pdf]

# Supplementary

## Tables

**Table S1.** Details of GWAS summary data

**Table S2.** Descriptive characteristics of the included population in the UK Biobank study

**Table S3a.** Association between BMI z-score and COVID-19 outcomes with sequential adjustments in the UK Biobank study

**Table S3b.** Association between FMI z-score and COVID-19 outcomes with sequential adjustments in the UK Biobank study

**Table S3c.** Association between SMMI z-score and COVID-19 outcomes with sequential adjustments in the UK Biobank study

**Table S3d.** Association between WHR z-score and COVID-19 outcomes with sequential adjustments in the UK Biobank study

**Table S3e.** Association between metabolic disturbance and COVID-19 outcomes with sequential adjustments in the UK Biobank study

**Table S3f.** Association between type 2 diabetes and COVID-19 outcomes with sequential adjustments in the UK Biobank study

**Table S4.** Associations of adiposity markers with COVID-19 outcomes with correction for regression dilution bias in the UK Biobank study

## Figures

**Figure S1.** DAG for the association between BMI, body fat distribution, and conditions caused by metabolic disturbance and incidence of severe COVID-19 outcomes

**Figure S2a.** Restricted cubic spline models for BMI z scores showing the hazard ratio for its association with COVID-19 outcomes

**Figure S2b.** Restricted cubic spline models for FMI z scores showing the hazard ratio for its association with COVID-19 outcomes

**Figure S2c.** Restricted cubic spline models for SMMI z scores showing the hazard ratio for its association with COVID-19 outcomes

**Figure S2d.** Restricted cubic spline models for WHR z scores showing the hazard ratio for its association with COVID-19 outcomes

**Figure S3a.** The causal effect estimates on COVID-19 test across different MR methods

**Figure S3b.** The causal effect estimates on COVID-19 hospital admission across different MR methods

**Figure S3c.** The causal effect estimates on very severe confirmed COVID-19 across different MR methods

**Figure S4a.** Effect modification of the associations between BMI and COVID-19 outcomes by age, gender, ethnicity, and cardiovascular disease

**Figure S4b.** Effect modification of the associations between FMI and COVID-19 outcomes by age, gender, ethnicity, and cardiovascular disease

**Figure S4c.** Effect modification of the associations between WHR and COVID-19 outcomes by age, gender, ethnicity, and cardiovascular disease

**Figure S4d. Effect modification of the associations between metabolic disturbance and COVID-19 outcomes by age, gender, ethnicity, and cardiovascular disease**

**Figure S4e. Effect modification of the associations between type 2 diabetes and COVID-19 outcomes by age, gender, ethnicity, and cardiovascular disease**

**Figure S5. Multivariable MR analysis assessing the causal effect estimates of BMI with individually adjusting for the risk factors listed on the y-axis**

**Figure S6. Multivariate MR analysis assessing the comparative causal role of each individual risk factor (listed on the y-axis) on the risk of COVID-19 conditional on body mass index**

**Table S1. Details of GWAS summary data.**

|    | Type     | Category              | Full Name                                              | MR-BASE ID       | Consortium | Year | Population | Sample_size | Ncase | Ncontrol | PMID     |
|----|----------|-----------------------|--------------------------------------------------------|------------------|------------|------|------------|-------------|-------|----------|----------|
| 1  | Outcome  |                       | covid vs. population                                   |                  | COVID19HG  | 2021 | European   | 1683768     | 38984 | 1644784  | NA       |
| 2  | Outcome  |                       | hospitalized covid vs. population                      |                  | COVID19HG  | 2021 | European   | 1887658     | 9986  | 1877672  | NA       |
| 3  | Outcome  |                       | very severe respiratory confirmed covid vs. population |                  | COVID19HG  | 2021 | European   | 1388342     | 5101  | 1383241  | NA       |
| 1  | Exposure | Total adiposity       | BMI (GIANT+UKBB)                                       |                  | GIANT      | 2018 | European   | 681275      | NA    | NA       | 30124842 |
| 2  | Exposure | Total adiposity       | Body fat percentage                                    | ukb-b-8909       | MRC-IEU    | 2018 | European   | 454633      | NA    | NA       | NA       |
| 3  | Exposure | Lean mass             | Whole body fat-free mass                               | ukb-b-13354      | MRC-IEU    | 2018 | European   | 454850      | NA    | NA       | NA       |
| 4  | Exposure | Lean mass             | Arm fat-free mass (left)                               | ukb-b-19925      | MRC-IEU    | 2018 | European   | 454672      | NA    | NA       | NA       |
| 5  | Exposure | Lean mass             | Leg fat-free mass (left)                               | ukb-b-16099      | MRC-IEU    | 2018 | European   | 454805      | NA    | NA       | NA       |
| 6  | Exposure | Fat mass distribution | Arm fat mass (left)                                    | ukb-b-8338       | MRC-IEU    | 2018 | European   | 454684      | NA    | NA       | NA       |
| 7  | Exposure | Fat mass distribution | Leg fat mass (left)                                    | ukb-b-7212       | MRC-IEU    | 2018 | European   | 454823      | NA    | NA       | NA       |
| 8  | Exposure | Fat mass distribution | Trunk fat mass                                         | ukb-b-20044      | MRC-IEU    | 2018 | European   | 454588      | NA    | NA       | NA       |
| 9  | Exposure | Fat mass distribution | Waist circumference                                    | ukb-b-9405       | MRC-IEU    | 2018 | European   | 462166      | NA    | NA       | NA       |
| 10 | Exposure | Fat mass distribution | Hip circumference                                      | ukb-b-15590      | MRC-IEU    | 2018 | European   | 462117      | NA    | NA       | NA       |
| 11 | Exposure | Fat mass distribution | Waist-to-hip ratio                                     | ieu-a-73         | NA         | 2015 | European   | 212244      | NA    | NA       | 25673412 |
| 12 | Exposure | Fat mass distribution | WHRadjBMI                                              |                  | GIANT      | 2019 | European   | 694649      | NA    | NA       | 30239722 |
| 13 | Exposure | Metabolic biomarkers  | Insulin Resistance                                     |                  | NA         | 2017 | European   | 188577      | NA    | NA       | 27841877 |
| 14 | Exposure | Metabolic biomarkers  | IGF-1                                                  | ukb-d-30770_irnt | NEALE LAB  | 2018 | European   | 342439      | NA    | NA       | NA       |
| 15 | Exposure | Metabolic biomarkers  | Glucose                                                | ukb-d-30740_irnt | NEALE LAB  | 2018 | European   | 314916      | NA    | NA       | NA       |
| 16 | Exposure | Metabolic biomarkers  | Glycated haemoglobin                                   | ukb-d-30750_irnt | NEALE LAB  | 2018 | European   | 344182      | NA    | NA       | NA       |
| 17 | Exposure | Metabolic biomarkers  | Adiponectin                                            |                  | NA         | 2019 | Mixed      | 67739       | NA    | NA       | 31178129 |
| 18 | Exposure | Metabolic biomarkers  | Apolipoprotein A                                       | ukb-d-30630_irnt | NEALE LAB  | 2018 | European   | 313387      | NA    | NA       | NA       |
| 19 | Exposure | Metabolic biomarkers  | HDL cholesterol                                        | ukb-d-30760_irnt | NEALE LAB  | 2018 | European   | 315133      | NA    | NA       | NA       |
| 20 | Exposure | Metabolic biomarkers  | Apolipoprotein B                                       | ukb-d-30640_irnt | NEALE LAB  | 2018 | European   | 342590      | NA    | NA       | NA       |
| 21 | Exposure | Metabolic biomarkers  | LDL                                                    | ukb-d-30780_irnt | NEALE LAB  | 2018 | European   | 343621      | NA    | NA       | NA       |
| 22 | Exposure | Metabolic biomarkers  | Triglycerides                                          | ukb-d-30870_irnt | NEALE LAB  | 2018 | European   | 343992      | NA    | NA       | NA       |
| 23 | Exposure | Diabetes              | Type 2 diabetes                                        | ebi-a-GCST006867 | NA         | 2018 | European   | 655666      | 61714 | 593952   | 30054458 |

Note: COVID19HG Covid19 Host Genetics Initiative; GIANT international Genetic Investigation of ANthropometric Traits; MRC-IEU MRC Integrative Epidemiology Unit; NA: not applicable

**Table S2. Descriptive characteristics of the included population in the UK Biobank study**

|                            | All            | COVID-19 test  |              |         | COVID-19 hospital admission |             |         | COVID-19 ICU admission |            |         | COVID-19 death |             |         |
|----------------------------|----------------|----------------|--------------|---------|-----------------------------|-------------|---------|------------------------|------------|---------|----------------|-------------|---------|
|                            |                | No             | Yes          | p-value | No                          | Yes         | p-value | No                     | Yes        | p-value | No             | Yes         | p-value |
| <b>N</b>                   | 435504         | 429938         | 5566         | <0.001  | 434937                      | 567         | <0.001  | 435397                 | 107        | <0.001  | 435138         | 366         | <0.001  |
| <b>Exposures</b>           |                |                |              |         |                             |             |         |                        |            |         |                |             |         |
| BMI, mean (SD)             | 27.4 (4.8)     | 27.4 (4.8)     | 28.8 (5.3)   | <0.001  | 27.4 (4.8)                  | 29.6 (5.2)  | <0.001  | 27.4 (4.8)             | 30.7 (5.2) | <0.001  | 27.4 (4.8)     | 29.7 (5.8)  | <0.001  |
| FMI, mean (SD)             | 8.8 (3.6)      | 8.8 (3.6)      | 9.5 (4.0)    | <0.001  | 8.8 (3.6)                   | 9.8 (3.9)   | <0.001  | 8.8 (3.6)              | 10.2 (4.2) | <0.001  | 8.8 (3.6)      | 9.9 (4.5)   | <0.001  |
| SMMI, mean (SD)            | 7.8 (1.3)      | 7.8 (1.3)      | 8.1 (1.4)    | <0.001  | 7.8 (1.3)                   | 8.4 (1.4)   | <0.001  | 7.8 (1.3)              | 8.8 (1.4)  | <0.001  | 7.8 (1.3)      | 8.4 (1.5)   | <0.001  |
| WHR, mean (SD)             | 0.9 (0.1)      | 0.9 (0.1)      | 0.9 (0.1)    | <0.001  | 0.9 (0.1)                   | 0.9 (0.1)   | <0.001  | 0.9 (0.1)              | 0.9 (0.1)  | <0.001  | 0.9 (0.1)      | 0.9 (0.1)   | <0.001  |
| Metabolic disturbance      | 55232 (12.7%)  | 54821 (12.6%)  | 411 (25.0%)  | <0.001  | 55039 (12.7%)               | 193 (34.3%) | <0.001  | 55198 (12.7%)          | 34 (32.7%) | <0.001  | 55095 (12.7%)  | 137 (37.6%) | <0.001  |
| Type 2 diabetes            | 40266 (9.2%)   | 39941 (9.2%)   | 325 (19.7%)  | <0.001  | 40120 (9.2%)                | 146 (26.0%) | <0.001  | 40242 (9.2%)           | 24 (23.1%) | <0.001  | 40153 (9.2%)   | 113 (31.0%) | <0.001  |
| <b>Demographics</b>        |                |                |              |         |                             |             |         |                        |            |         |                |             |         |
| Age, mean (SD)             | 67.5 (8.1)     | 67.5 (8.1)     | 67.0 (9.2)   | 0.012   | 67.5 (8.1)                  | 69.8 (8.3)  | <0.001  | 67.5 (8.1)             | 67.2 (8.0) | 0.74    | 67.5 (8.1)     | 73.6 (6.1)  | <0.001  |
| Sex                        |                |                |              | <0.001  |                             |             | <0.001  |                        |            | <0.001  |                |             | <0.001  |
| Female                     | 237317 (54.5%) | 236531 (54.5%) | 786 (47.8%)  |         | 237105 (54.5%)              | 212 (37.7%) |         | 237281 (54.5%)         | 36 (34.6%) |         | 237186 (54.5%) | 131 (36.0%) |         |
| Male                       | 198187 (45.5%) | 197327 (45.5%) | 860 (52.2%)  |         | 197837 (45.5%)              | 350 (62.3%) |         | 198119 (45.5%)         | 68 (65.4%) |         | 197954 (45.5%) | 233 (64.0%) |         |
| Ethnicity                  |                |                |              | <0.001  |                             |             | <0.001  |                        |            | <0.001  |                |             | <0.001  |
| White                      | 408458 (93.8%) | 407034 (93.8%) | 1424 (86.5%) |         | 407984 (93.8%)              | 474 (84.3%) |         | 408374 (93.8%)         | 84 (80.8%) |         | 408134 (93.8%) | 324 (89.0%) |         |
| Black                      | 7609 (1.7%)    | 7523 (1.7%)    | 86 (5.2%)    |         | 7566 (1.7%)                 | 43 (7.7%)   |         | 7599 (1.7%)            | 10 (9.6%)  |         | 7587 (1.7%)    | 22 (6.0%)   |         |
| Asian                      | 10468 (2.4%)   | 10387 (2.4%)   | 81 (4.9%)    |         | 10440 (2.4%)                | 28 (5.0%)   |         | 10462 (2.4%)           | 6 (5.8%)   |         | 10458 (2.4%)   | 10 (2.7%)   |         |
| Others                     | 6829 (1.6%)    | 6782 (1.6%)    | 47 (2.9%)    |         | 6815 (1.6%)                 | 14 (2.5%)   |         | 6826 (1.6%)            | 3 (2.9%)   |         | 6824 (1.6%)    | 5 (1.4%)    |         |
| Missing                    | 2140 (0.5%)    | 2132 (0.5%)    | 8 (0.5%)     |         | 2137 (0.5%)                 | 3 (0.5%)    |         | 2139 (0.5%)            | 1 (1.0%)   |         | 2137 (0.5%)    | 3 (0.8%)    |         |
| Townsend index (quintiles) |                |                |              | <0.001  |                             |             | <0.001  |                        |            | <0.001  |                |             | <0.001  |
| Q1                         | 86368 (19.8%)  | 86138 (19.9%)  | 230 (14.0%)  |         | 86287 (19.8%)               | 81 (14.4%)  |         | 86354 (19.8%)          | 14 (13.5%) |         | 86311 (19.8%)  | 57 (15.7%)  |         |
| Q2                         | 88080 (20.2%)  | 87806 (20.2%)  | 274 (16.6%)  |         | 87998 (20.2%)               | 82 (14.6%)  |         | 88067 (20.2%)          | 13 (12.5%) |         | 88024 (20.2%)  | 56 (15.4%)  |         |
| Q3                         | 87417 (20.1%)  | 87130 (20.1%)  | 287 (17.4%)  |         | 87336 (20.1%)               | 81 (14.4%)  |         | 87399 (20.1%)          | 18 (17.3%) |         | 87358 (20.1%)  | 59 (16.2%)  |         |
| Q4                         | 87213 (20.0%)  | 86865 (20.0%)  | 348 (21.1%)  |         | 87095 (20.0%)               | 118 (21.0%) |         | 87192 (20.0%)          | 21 (20.2%) |         | 87143 (20.0%)  | 70 (19.2%)  |         |
| Q5                         | 85928 (19.7%)  | 85422 (19.7%)  | 506 (30.7%)  |         | 85728 (19.7%)               | 200 (35.6%) |         | 85890 (19.7%)          | 38 (36.5%) |         | 85807 (19.7%)  | 121 (33.2%) |         |

|                                                                          |                |                |             |        |                |             |        |                |            |       |                |             |        |
|--------------------------------------------------------------------------|----------------|----------------|-------------|--------|----------------|-------------|--------|----------------|------------|-------|----------------|-------------|--------|
| Missing                                                                  | 498 (0.1%)     | 497 (0.1%)     | 1 (0.1%)    |        | 498 (0.1%)     | 0 (0.0%)    |        | 498 (0.1%)     | 0 (0.0%)   |       | 497 (0.1%)     | 1 (0.3%)    |        |
| Education                                                                |                |                |             | <0.001 |                |             | <0.001 |                |            | 0.057 |                |             | <0.001 |
| None of the above                                                        | 72498 (16.6%)  | 72100 (16.6%)  | 398 (24.2%) |        | 72331 (16.6%)  | 167 (29.7%) |        | 72477 (16.6%)  | 21 (20.2%) |       | 72372 (16.6%)  | 126 (34.6%) |        |
| Vocational qualification (NVQ, HND or HNC)                               | 61783 (14.2%)  | 61523 (14.2%)  | 260 (15.8%) |        | 61703 (14.2%)  | 80 (14.2%)  |        | 61771 (14.2%)  | 12 (11.5%) |       | 61738 (14.2%)  | 45 (12.4%)  |        |
| Any school degree (A-level, AS-level, O-level, GCSE, CSE)                | 123397 (28.3%) | 123043 (28.4%) | 354 (21.5%) |        | 123286 (28.3%) | 111 (19.8%) |        | 123367 (28.3%) | 30 (28.8%) |       | 123334 (28.3%) | 63 (17.3%)  |        |
| Higher degree (college, university or professional degree/qualification) | 168977 (38.8%) | 168385 (38.8%) | 592 (36.0%) |        | 168788 (38.8%) | 189 (33.6%) |        | 168942 (38.8%) | 35 (33.7%) |       | 168862 (38.8%) | 115 (31.6%) |        |
| Missing                                                                  | 8849 (2.0%)    | 8807 (2.0%)    | 42 (2.6%)   |        | 8834 (2.0%)    | 15 (2.7%)   |        | 8843 (2.0%)    | 6 (5.8%)   |       | 8834 (2.0%)    | 15 (4.1%)   |        |
| <b>Health behaviour</b>                                                  |                |                |             |        |                |             |        |                |            |       |                |             |        |
| Smoking status                                                           |                |                |             | <0.001 |                |             | <0.001 |                |            | 0.007 |                |             | <0.001 |
| Never                                                                    | 237035 (54.4%) | 236236 (54.5%) | 799 (48.5%) |        | 236779 (54.4%) | 256 (45.6%) |        | 236995 (54.4%) | 40 (38.5%) |       | 236900 (54.4%) | 135 (37.1%) |        |
| Previous                                                                 | 151375 (34.8%) | 150735 (34.7%) | 640 (38.9%) |        | 151139 (34.7%) | 236 (42.0%) |        | 151323 (34.8%) | 52 (50.0%) |       | 151204 (34.7%) | 171 (47.0%) |        |
| Current                                                                  | 44842 (10.3%)  | 44651 (10.3%)  | 191 (11.6%) |        | 44781 (10.3%)  | 61 (10.9%)  |        | 44831 (10.3%)  | 11 (10.6%) |       | 44788 (10.3%)  | 54 (14.8%)  |        |
| Missing                                                                  | 2252 (0.5%)    | 2236 (0.5%)    | 16 (1.0%)   |        | 2243 (0.5%)    | 9 (1.6%)    |        | 2251 (0.5%)    | 1 (1.0%)   |       | 2248 (0.5%)    | 4 (1.1%)    |        |
| Physical activity(MET-minutes per week)                                  |                |                |             | <0.001 |                |             | <0.001 |                |            | 0.50  |                |             | 0.25   |
| Low (<600)                                                               | 98517 (22.6%)  | 98094 (22.6%)  | 423 (25.7%) |        | 98348 (22.6%)  | 169 (30.1%) |        | 98491 (22.6%)  | 26 (25.0%) |       | 98424 (22.6%)  | 93 (25.5%)  |        |
| Moderate(≥600 and <3000)                                                 | 201447 (46.3%) | 200782 (46.3%) | 665 (40.4%) |        | 201233 (46.3%) | 214 (38.1%) |        | 201406 (46.3%) | 41 (39.4%) |       | 201294 (46.3%) | 153 (42.0%) |        |
| High(≥ 3000)                                                             | 118011 (27.1%) | 117545 (27.1%) | 466 (28.3%) |        | 117864 (27.1%) | 147 (26.2%) |        | 117980 (27.1%) | 31 (29.8%) |       | 117912 (27.1%) | 99 (27.2%)  |        |
| Missing                                                                  | 17529 (4.0%)   | 17437 (4.0%)   | 92 (5.6%)   |        | 17497 (4.0%)   | 32 (5.7%)   |        | 17523 (4.0%)   | 6 (5.8%)   |       | 17510 (4.0%)   | 19 (5.2%)   |        |
| Alcohol intake group(unit/week)                                          |                |                |             | <0.001 |                |             | <0.001 |                |            | 0.23  |                |             | <0.001 |
| None                                                                     | 11613 (2.7%)   | 11558 (2.7%)   | 55 (3.3%)   |        | 11589 (2.7%)   | 24 (4.3%)   |        | 11610 (2.7%)   | 3 (2.9%)   |       | 11600 (2.7%)   | 13 (3.6%)   |        |
| Occasional (<1)                                                          | 8916 (2.0%)    | 8875 (2.0%)    | 41 (2.5%)   |        | 8908 (2.0%)    | 8 (1.4%)    |        | 8915 (2.0%)    | 1 (1.0%)   |       | 8907 (2.0%)    | 9 (2.5%)    |        |
| Moderate (1-14)                                                          | 134150 (30.8%) | 133717 (30.8%) | 433 (26.3%) |        | 134012 (30.8%) | 138 (24.6%) |        | 134127 (30.8%) | 23 (22.1%) |       | 134070 (30.8%) | 80 (22.0%)  |        |
| Heavy (>14)                                                              | 185420 (42.6%) | 184788 (42.6%) | 632 (38.4%) |        | 185197 (42.6%) | 223 (39.7%) |        | 185373 (42.6%) | 47 (45.2%) |       | 185263 (42.6%) | 157 (43.1%) |        |
| Missing                                                                  | 95405 (21.9%)  | 94920 (21.9%)  | 485 (29.5%) |        | 95236 (21.9%)  | 169 (30.1%) |        | 95375 (21.9%)  | 30 (28.8%) |       | 95300 (21.9%)  | 105 (28.8%) |        |
| Fruit & vegetables intake(servings/day)                                  |                |                |             | <0.001 |                |             | 0.023  |                |            | 0.16  |                |             | 0.033  |

|                                             |                |                |              |        |                |             |        |                |            |        |                |             |        |
|---------------------------------------------|----------------|----------------|--------------|--------|----------------|-------------|--------|----------------|------------|--------|----------------|-------------|--------|
| 0-1                                         | 11371 (2.6%)   | 11304 (2.6%)   | 67 (4.1%)    |        | 11344 (2.6%)   | 27 (4.8%)   |        | 11365 (2.6%)   | 6 (5.8%)   |        | 11357 (2.6%)   | 14 (3.8%)   |        |
| 1-2                                         | 43695 (10.0%)  | 43509 (10.0%)  | 186 (11.3%)  |        | 43636 (10.0%)  | 59 (10.5%)  |        | 43688 (10.0%)  | 7 (6.7%)   |        | 43663 (10.0%)  | 32 (8.8%)   |        |
| 2-5                                         | 268188 (61.6%) | 267229 (61.6%) | 959 (58.3%)  |        | 267855 (61.6%) | 333 (59.3%) |        | 268119 (61.6%) | 69 (66.3%) |        | 267983 (61.6%) | 205 (56.3%) |        |
| 5+                                          | 110862 (25.5%) | 110435 (25.5%) | 427 (25.9%)  |        | 110720 (25.5%) | 142 (25.3%) |        | 110840 (25.5%) | 22 (21.2%) |        | 110752 (25.5%) | 110 (30.2%) |        |
| Missing                                     | 1388 (0.3%)    | 1381 (0.3%)    | 7 (0.4%)     |        | 1387 (0.3%)    | 1 (0.2%)    |        | 1388 (0.3%)    | 0 (0.0%)   |        | 1385 (0.3%)    | 3 (0.8%)    |        |
| <b>Non-obesity-related morbidity (with)</b> |                |                |              |        |                |             |        |                |            |        |                |             |        |
| COPD                                        | 17448 (4.0%)   | 17289 (4.0%)   | 159 (9.7%)   | <0.001 | 17361 (4.0%)   | 87 (15.5%)  | <0.001 | 17437 (4.0%)   | 11 (10.6%) | <0.001 | 17385 (4.0%)   | 63 (17.3%)  | <0.001 |
| Asthma                                      | 62666 (14.4%)  | 62356 (14.4%)  | 310 (18.8%)  | <0.001 | 62541 (14.4%)  | 125 (22.2%) | <0.001 | 62641 (14.4%)  | 25 (24.0%) | 0.005  | 62602 (14.4%)  | 64 (17.6%)  | 0.082  |
| Autoimmune condition                        | 10425 (2.4%)   | 10375 (2.4%)   | 50 (3.0%)    | 0.087  | 10402 (2.4%)   | 23 (4.1%)   | 0.008  | 10420 (2.4%)   | 5 (4.8%)   | 0.11   | 10409 (2.4%)   | 16 (4.4%)   | 0.012  |
| Colitis                                     | 4990 (1.1%)    | 4959 (1.1%)    | 31 (1.9%)    | 0.005  | 4975 (1.1%)    | 15 (2.7%)   | <0.001 | 4987 (1.1%)    | 3 (2.9%)   | 0.096  | 4982 (1.1%)    | 8 (2.2%)    | 0.059  |
| Crohn disease                               | 2601 (0.6%)    | 2587 (0.6%)    | 14 (0.9%)    | 0.18   | 2591 (0.6%)    | 10 (1.8%)   | <0.001 | 2599 (0.6%)    | 2 (1.9%)   | 0.079  | 2597 (0.6%)    | 4 (1.1%)    | 0.21   |
| <b>Obesity-related morbidity(with)</b>      |                |                |              |        |                |             |        |                |            |        |                |             |        |
| Hypertension                                | 254659 (58.5%) | 253554 (58.4%) | 1105 (67.1%) | <0.001 | 254220 (58.4%) | 439 (78.1%) | <0.001 | 254576 (58.5%) | 83 (79.8%) | <0.001 | 254341 (58.5%) | 318 (87.4%) | <0.001 |
| CVD                                         | 186112 (42.7%) | 185031 (42.6%) | 1081 (65.7%) | <0.001 | 185653 (42.7%) | 459 (81.7%) | <0.001 | 186022 (42.7%) | 90 (86.5%) | <0.001 | 185798 (42.7%) | 314 (86.3%) | <0.001 |
| Reflux                                      | 58281 (13.4%)  | 57959 (13.4%)  | 322 (19.6%)  | <0.001 | 58140 (13.4%)  | 141 (25.1%) | <0.001 | 58258 (13.4%)  | 23 (22.1%) | 0.009  | 58208 (13.4%)  | 73 (20.1%)  | <0.001 |
| Sleep apnoea                                | 8789 (2.0%)    | 8728 (2.0%)    | 61 (3.7%)    | <0.001 | 8758 (2.0%)    | 31 (5.5%)   | <0.001 | 8781 (2.0%)    | 8 (7.7%)   | <0.001 | 8765 (2.0%)    | 24 (6.6%)   | <0.001 |

Note: BMI body mass index; FMI fat mass index; SMMI skeletal muscle mass index; WHR Waist to hip ratio; ICU intensive care unit

**Table S3a. Association between BMI z-score and COVID-19 outcomes with sequential adjustments in the UK Biobank study**

| Model and adjustment                                                                                                                                                                                                                                                 | Unweighted HR (95% CI) | Weighted HR (95% CI) |
|----------------------------------------------------------------------------------------------------------------------------------------------------------------------------------------------------------------------------------------------------------------------|------------------------|----------------------|
| COVID-19 test                                                                                                                                                                                                                                                        |                        |                      |
| Model 1=Age and gender                                                                                                                                                                                                                                               | 1.31 (1.25 to 1.37)    | 1.21 (1.16 to 1.27)  |
| Model 2=Model 1+demographics                                                                                                                                                                                                                                         | 1.26 (1.20 to 1.32)    | 1.19 (1.13 to 1.24)  |
| Model 3=Model 2+behavioural risks                                                                                                                                                                                                                                    | 1.23 (1.18 to 1.29)    | 1.17 (1.12 to 1.22)  |
| Model 4=Model 3+Non-obesity-related morbidity                                                                                                                                                                                                                        | 1.22 (1.16 to 1.28)    | 1.16 (1.11 to 1.22)  |
| Model 5=Model 4+obesity-related morbidity                                                                                                                                                                                                                            | 1.14 (1.09 to 1.20)    | 1.13 (1.07 to 1.19)  |
| COVID-19 hospital admission                                                                                                                                                                                                                                          |                        |                      |
| Model 1=Age and gender                                                                                                                                                                                                                                               | 1.49 (1.38 to 1.6)     | 1.39 (1.30 to 1.48)  |
| Model 2=Model 1+demographics                                                                                                                                                                                                                                         | 1.40 (1.30 to 1.51)    | 1.34 (1.26 to 1.44)  |
| Model 3=Model 2+behavioural risks                                                                                                                                                                                                                                    | 1.36 (1.26 to 1.47)    | 1.31 (1.22 to 1.41)  |
| Model 4=Model 3+Non-obesity-related morbidity                                                                                                                                                                                                                        | 1.33 (1.23 to 1.43)    | 1.29 (1.20 to 1.39)  |
| Model 5=Model 4+obesity-related morbidity                                                                                                                                                                                                                            | 1.21 (1.11 to 1.31)    | 1.21 (1.11 to 1.31)  |
| COVID-19 ICU admission                                                                                                                                                                                                                                               |                        |                      |
| Model 1=Age and gender                                                                                                                                                                                                                                               | 1.69 (1.46 to 1.97)    | 1.61 (1.44 to 1.80)  |
| Model 2=Model 1+demographics                                                                                                                                                                                                                                         | 1.63 (1.40 to 1.90)    | 1.58 (1.41 to 1.77)  |
| Model 3=Model 2+behavioural risks                                                                                                                                                                                                                                    | 1.62 (1.38 to 1.90)    | 1.58 (1.39 to 1.80)  |
| Model 4=Model 3+Non-obesity-related morbidity                                                                                                                                                                                                                        | 1.59 (1.35 to 1.86)    | 1.55 (1.36 to 1.77)  |
| Model 5=Model 4+obesity-related morbidity                                                                                                                                                                                                                            | 1.38 (1.16 to 1.65)    | 1.38 (1.20 to 1.58)  |
| COVID-19 death                                                                                                                                                                                                                                                       |                        |                      |
| Model 1=Age and gender                                                                                                                                                                                                                                               | 1.52 (1.38 to 1.66)    | 1.44 (1.30 to 1.60)  |
| Model 2=Model 1+demographics                                                                                                                                                                                                                                         | 1.43 (1.30 to 1.57)    | 1.39 (1.25 to 1.54)  |
| Model 3=Model 2+behavioural risks                                                                                                                                                                                                                                    | 1.41 (1.28 to 1.56)    | 1.37 (1.23 to 1.53)  |
| Model 4=Model 3+Non-obesity-related morbidity                                                                                                                                                                                                                        | 1.39 (1.26 to 1.53)    | 1.36 (1.22 to 1.51)  |
| Model 5=Model 4+obesity-related morbidity                                                                                                                                                                                                                            | 1.23 (1.11 to 1.37)    | 1.23 (1.09 to 1.39)  |
| Note: Estimates are hazard ratios (HR) with 95% CI per one unit increase in z score of the exposure; except for metabolic disturbance and type 2 diabetes as binary exposures. Weighted for likelihood of being tested for COVID-19 by Inverse Probability Weighting |                        |                      |

**Table S3b. Association between FMI z-score and COVID-19 outcomes with sequential adjustments in the UK Biobank study**

| Model and adjustment                                                                                                                                                                                                                                                              | Unweighted HR(95% CI) | Weighted HR(95% CI) |
|-----------------------------------------------------------------------------------------------------------------------------------------------------------------------------------------------------------------------------------------------------------------------------------|-----------------------|---------------------|
| COVID-19 test                                                                                                                                                                                                                                                                     |                       |                     |
| Model 1=Age and gender                                                                                                                                                                                                                                                            | 1.26 (1.16 to 1.37)   | 1.17 (1.07 to 1.28) |
| Model 2=Model 1+demographics                                                                                                                                                                                                                                                      | 1.19 (1.09 to 1.29)   | 1.14 (1.04 to 1.24) |
| Model 3=Model 2+behavioural risks                                                                                                                                                                                                                                                 | 1.17 (1.08 to 1.28)   | 1.13 (1.03 to 1.24) |
| Model 4=Model 3+Non-obesity-related morbidity                                                                                                                                                                                                                                     | 1.15 (1.06 to 1.25)   | 1.12 (1.03 to 1.23) |
| Model 5=Model 4+obesity-related morbidity                                                                                                                                                                                                                                         | 1.11 (1.01 to 1.21)   | 1.10 (1.00 to 1.20) |
| COVID-19 hospital admission                                                                                                                                                                                                                                                       |                       |                     |
| Model 1=Age and gender                                                                                                                                                                                                                                                            | 1.47 (1.28 to 1.70)   | 1.41 (1.22 to 1.63) |
| Model 2=Model 1+demographics                                                                                                                                                                                                                                                      | 1.37 (1.19 to 1.57)   | 1.35 (1.17 to 1.55) |
| Model 3=Model 2+behavioural risks                                                                                                                                                                                                                                                 | 1.32 (1.15 to 1.52)   | 1.31 (1.13 to 1.51) |
| Model 4=Model 3+Non-obesity-related morbidity                                                                                                                                                                                                                                     | 1.27 (1.11 to 1.47)   | 1.28 (1.11 to 1.48) |
| Model 5=Model 4+obesity-related morbidity                                                                                                                                                                                                                                         | 1.21 (1.05 to 1.40)   | 1.23 (1.06 to 1.42) |
| COVID-19 ICU admission                                                                                                                                                                                                                                                            |                       |                     |
| Model 1=Age and gender                                                                                                                                                                                                                                                            | 1.21 (0.89 to 1.66)   | 1.21 (0.88 to 1.66) |
| Model 2=Model 1+demographics                                                                                                                                                                                                                                                      | 1.16 (0.85 to 1.58)   | 1.18 (0.87 to 1.61) |
| Model 3=Model 2+behavioural risks                                                                                                                                                                                                                                                 | 1.15 (0.84 to 1.57)   | 1.17 (0.86 to 1.60) |
| Model 4=Model 3+Non-obesity-related morbidity                                                                                                                                                                                                                                     | 1.12 (0.82 to 1.53)   | 1.16 (0.84 to 1.58) |
| Model 5=Model 4+obesity-related morbidity                                                                                                                                                                                                                                         | 1.04 (0.76 to 1.43)   | 1.08 (0.79 to 1.48) |
| COVID-19 death                                                                                                                                                                                                                                                                    |                       |                     |
| Model 1=Age and gender                                                                                                                                                                                                                                                            | 1.42 (1.20 to 1.70)   | 1.35 (1.10 to 1.65) |
| Model 2=Model 1+demographics                                                                                                                                                                                                                                                      | 1.34 (1.13 to 1.59)   | 1.29 (1.06 to 1.57) |
| Model 3=Model 2+behavioural risks                                                                                                                                                                                                                                                 | 1.32 (1.11 to 1.57)   | 1.27 (1.04 to 1.55) |
| Model 4=Model 3+Non-obesity-related morbidity                                                                                                                                                                                                                                     | 1.28 (1.08 to 1.53)   | 1.25 (1.02 to 1.53) |
| Model 5=Model 4+obesity-related morbidity                                                                                                                                                                                                                                         | 1.21 (1.02 to 1.45)   | 1.19 (0.97 to 1.46) |
| Note: Estimates are hazard ratios (HR) with 95% CI per one increase one unit increase in z score of the exposure; except for metabolic disturbance and type 2 diabetes as binary exposures. Weighted for likelihood of being tested for COVID-19 by Inverse Probability Weighting |                       |                     |



**Table S3c. Association between SMMI z-score and COVID-19 outcomes with sequential adjustments in the UK Biobank study**

| Model and adjustment                                                                                                                                                                                                                                                              | Unweighted HR(95% CI) | Weighted HR(95% CI) |
|-----------------------------------------------------------------------------------------------------------------------------------------------------------------------------------------------------------------------------------------------------------------------------------|-----------------------|---------------------|
| COVID-19 test                                                                                                                                                                                                                                                                     |                       |                     |
| Model 1=Age and gender                                                                                                                                                                                                                                                            | 1.07 (0.98 to 1.16)   | 1.05 (0.96 to 1.14) |
| Model 2=Model 1+demographics                                                                                                                                                                                                                                                      | 1.08 (1.00 to 1.17)   | 1.06 (0.97 to 1.15) |
| Model 3=Model 2+behavioural risks                                                                                                                                                                                                                                                 | 1.07 (0.99 to 1.16)   | 1.05 (0.96 to 1.14) |
| Model 4=Model 3+Non-obesity-related morbidity                                                                                                                                                                                                                                     | 1.08 (0.99 to 1.17)   | 1.05 (0.97 to 1.14) |
| Model 5=Model 4+obesity-related morbidity                                                                                                                                                                                                                                         | 1.05 (0.96 to 1.13)   | 1.04 (0.95 to 1.13) |
| COVID-19 hospital admission                                                                                                                                                                                                                                                       |                       |                     |
| Model 1=Age and gender                                                                                                                                                                                                                                                            | 1.03 (0.90 to 1.18)   | 1.01 (0.87 to 1.16) |
| Model 2=Model 1+demographics                                                                                                                                                                                                                                                      | 1.05 (0.92 to 1.20)   | 1.02 (0.89 to 1.17) |
| Model 3=Model 2+behavioural risks                                                                                                                                                                                                                                                 | 1.05 (0.92 to 1.20)   | 1.02 (0.89 to 1.17) |
| Model 4=Model 3+Non-obesity-related morbidity                                                                                                                                                                                                                                     | 1.06 (0.93 to 1.21)   | 1.03 (0.90 to 1.18) |
| Model 5=Model 4+obesity-related morbidity                                                                                                                                                                                                                                         | 1.01 (0.89 to 1.15)   | 0.99 (0.87 to 1.14) |
| COVID-19 ICU admission                                                                                                                                                                                                                                                            |                       |                     |
| Model 1=Age and gender                                                                                                                                                                                                                                                            | 1.41 (1.05 to 1.90)   | 1.35 (1.03 to 1.78) |
| Model 2=Model 1+demographics                                                                                                                                                                                                                                                      | 1.42 (1.06 to 1.89)   | 1.35 (1.04 to 1.76) |
| Model 3=Model 2+behavioural risks                                                                                                                                                                                                                                                 | 1.43 (1.07 to 1.91)   | 1.36 (1.04 to 1.78) |
| Model 4=Model 3+Non-obesity-related morbidity                                                                                                                                                                                                                                     | 1.43 (1.07 to 1.90)   | 1.36 (1.04 to 1.77) |
| Model 5=Model 4+obesity-related morbidity                                                                                                                                                                                                                                         | 1.32 (0.99 to 1.76)   | 1.27 (0.98 to 1.65) |
| COVID-19 death                                                                                                                                                                                                                                                                    |                       |                     |
| Model 1=Age and gender                                                                                                                                                                                                                                                            | 1.09 (0.93 to 1.29)   | 1.10 (0.91 to 1.33) |
| Model 2=Model 1+demographics                                                                                                                                                                                                                                                      | 1.09 (0.93 to 1.29)   | 1.10 (0.91 to 1.33) |
| Model 3=Model 2+behavioural risks                                                                                                                                                                                                                                                 | 1.10 (0.93 to 1.29)   | 1.11 (0.92 to 1.34) |
| Model 4=Model 3+Non-obesity-related morbidity                                                                                                                                                                                                                                     | 1.11 (0.94 to 1.30)   | 1.11 (0.92 to 1.34) |
| Model 5=Model 4+obesity-related morbidity                                                                                                                                                                                                                                         | 1.03 (0.88 to 1.22)   | 1.05 (0.87 to 1.26) |
| Note: Estimates are hazard ratios (HR) with 95% CI per one increase one unit increase in z score of the exposure; except for metabolic disturbance and type 2 diabetes as binary exposures. Weighted for likelihood of being tested for COVID-19 by Inverse Probability Weighting |                       |                     |

**Table S3d. Association between WHR z-score and COVID-19 outcomes with sequential adjustments in the UK Biobank study**

| Model and adjustment                                                                                                                                                                                                                                                                 | Unweighted HR(95% CI) | Weighted HR(95% CI) |
|--------------------------------------------------------------------------------------------------------------------------------------------------------------------------------------------------------------------------------------------------------------------------------------|-----------------------|---------------------|
| COVID-19 test                                                                                                                                                                                                                                                                        |                       |                     |
| Model 1=Age and gender                                                                                                                                                                                                                                                               | 1.50 (1.40 to 1.6)    | 1.65 (1.47 to 1.85) |
| Model 2=Model 1+demographics                                                                                                                                                                                                                                                         | 1.39 (1.29 to 1.49)   | 1.51 (1.35 to 1.70) |
| Model 3=Model 2+behavioural risks                                                                                                                                                                                                                                                    | 1.36 (1.26 to 1.46)   | 1.47 (1.31 to 1.65) |
| Model 4=Model 3+Non-obesity-related morbidity                                                                                                                                                                                                                                        | 1.32 (1.23 to 1.42)   | 1.43 (1.27 to 1.62) |
| Model 5=Model 4+obesity-related morbidity                                                                                                                                                                                                                                            | 1.21 (1.12 to 1.31)   | 1.29 (1.14 to 1.46) |
| COVID-19 hospital admission                                                                                                                                                                                                                                                          |                       |                     |
| Model 1=Age and gender                                                                                                                                                                                                                                                               | 1.77 (1.61 to 1.94)   | 1.62 (1.46 to 1.79) |
| Model 2=Model 1+demographics                                                                                                                                                                                                                                                         | 1.67 (1.49 to 1.86)   | 1.54 (1.37 to 1.72) |
| Model 3=Model 2+behavioural risks                                                                                                                                                                                                                                                    | 1.61 (1.44 to 1.80)   | 1.49 (1.33 to 1.67) |
| Model 4=Model 3+Non-obesity-related morbidity                                                                                                                                                                                                                                        | 1.54 (1.37 to 1.73)   | 1.44 (1.28 to 1.62) |
| Model 5=Model 4+obesity-related morbidity                                                                                                                                                                                                                                            | 1.36 (1.20 to 1.55)   | 1.31 (1.16 to 1.49) |
| COVID-19 ICU admission                                                                                                                                                                                                                                                               |                       |                     |
| Model 1=Age and gender                                                                                                                                                                                                                                                               | 1.84 (1.52 to 2.22)   | 1.84 (1.57 to 2.16) |
| Model 2=Model 1+demographics                                                                                                                                                                                                                                                         | 1.78 (1.44 to 2.22)   | 1.80 (1.50 to 2.16) |
| Model 3=Model 2+behavioural risks                                                                                                                                                                                                                                                    | 1.76 (1.40 to 2.21)   | 1.79 (1.47 to 2.17) |
| Model 4=Model 3+Non-obesity-related morbidity                                                                                                                                                                                                                                        | 1.71 (1.34 to 2.18)   | 1.75 (1.42 to 2.15) |
| Model 5=Model 4+obesity-related morbidity                                                                                                                                                                                                                                            | 1.43 (1.07 to 1.92)   | 1.48 (1.16 to 1.90) |
| COVID-19 death                                                                                                                                                                                                                                                                       |                       |                     |
| Model 1=Age and gender                                                                                                                                                                                                                                                               | 1.78 (1.58 to 2.02)   | 1.73 (1.50 to 2.00) |
| Model 2=Model 1+demographics                                                                                                                                                                                                                                                         | 1.68 (1.46 to 1.93)   | 1.65 (1.41 to 1.94) |
| Model 3=Model 2+behavioural risks                                                                                                                                                                                                                                                    | 1.62 (1.40 to 1.88)   | 1.60 (1.35 to 1.90) |
| Model 4=Model 3+Non-obesity-related morbidity                                                                                                                                                                                                                                        | 1.57 (1.35 to 1.83)   | 1.56 (1.31 to 1.86) |
| Model 5=Model 4+obesity-related morbidity                                                                                                                                                                                                                                            | 1.37 (1.17 to 1.61)   | 1.39 (1.16 to 1.68) |
| Note: Estimates are hazard ratios (HR) with 95% CI per one increase one unit increase in z score of the exposure; except for metabolic disturbance and type 2 diabetes as binary exposures.<br>Weighted for likelihood of being tested for COVID-19 by Inverse Probability Weighting |                       |                     |

**Table S3e. Association between metabolic disturbance and COVID-19 outcomes with sequential adjustments in the UK Biobank study**

| Model and adjustment                                                                                                                                                                                                                                                                 | Unweighted HR(95% CI) | Weighted HR(95% CI) |
|--------------------------------------------------------------------------------------------------------------------------------------------------------------------------------------------------------------------------------------------------------------------------------------|-----------------------|---------------------|
| COVID-19 test                                                                                                                                                                                                                                                                        |                       |                     |
| Model 1=Age and gender                                                                                                                                                                                                                                                               | 2.34 (2.09 to 2.62)   | 1.72 (1.51 to 1.94) |
| Model 2=Model 1+demographics                                                                                                                                                                                                                                                         | 1.98 (1.77 to 2.23)   | 1.56 (1.37 to 1.77) |
| Model 3=Model 2+behavioural risks                                                                                                                                                                                                                                                    | 1.90 (1.69 to 2.14)   | 1.51 (1.33 to 1.71) |
| Model 4=Model 3+Non-obesity-related morbidity                                                                                                                                                                                                                                        | 1.81 (1.61 to 2.04)   | 1.47 (1.29 to 1.68) |
| Model 5=Model 4+obesity-related morbidity                                                                                                                                                                                                                                            | 1.50 (1.32 to 1.69)   | 1.31 (1.15 to 1.50) |
| COVID-19 hospital admission                                                                                                                                                                                                                                                          |                       |                     |
| Model 1=Age and gender                                                                                                                                                                                                                                                               | 3.13 (2.62 to 3.73)   | 2.36 (1.96 to 2.85) |
| Model 2=Model 1+demographics                                                                                                                                                                                                                                                         | 2.51 (2.09 to 3.01)   | 2.06 (1.70 to 2.50) |
| Model 3=Model 2+behavioural risks                                                                                                                                                                                                                                                    | 2.37 (1.97 to 2.85)   | 1.98 (1.63 to 2.40) |
| Model 4=Model 3+Non-obesity-related morbidity                                                                                                                                                                                                                                        | 2.19 (1.82 to 2.64)   | 1.87 (1.53 to 2.27) |
| Model 5=Model 4+obesity-related morbidity                                                                                                                                                                                                                                            | 1.69 (1.39 to 2.04)   | 1.52 (1.24 to 1.85) |
| COVID-19 ICU admission                                                                                                                                                                                                                                                               |                       |                     |
| Model 1=Age and gender                                                                                                                                                                                                                                                               | 3.24 (2.13 to 4.92)   | 2.38 (1.55 to 3.66) |
| Model 2=Model 1+demographics                                                                                                                                                                                                                                                         | 2.58 (1.67 to 3.97)   | 2.07 (1.33 to 3.21) |
| Model 3=Model 2+behavioural risks                                                                                                                                                                                                                                                    | 2.50 (1.62 to 3.87)   | 2.03 (1.31 to 3.16) |
| Model 4=Model 3+Non-obesity-related morbidity                                                                                                                                                                                                                                        | 2.34 (1.50 to 3.63)   | 1.92 (1.22 to 3.01) |
| Model 5=Model 4+obesity-related morbidity                                                                                                                                                                                                                                            | 1.54 (0.99 to 2.41)   | 1.32 (0.83 to 2.10) |
| COVID-19 death                                                                                                                                                                                                                                                                       |                       |                     |
| Model 1=Age and gender                                                                                                                                                                                                                                                               | 3.03 (2.44 to 3.75)   | 2.35 (1.85 to 2.99) |
| Model 2=Model 1+demographics                                                                                                                                                                                                                                                         | 2.57 (2.06 to 3.20)   | 2.07 (1.62 to 2.65) |
| Model 3=Model 2+behavioural risks                                                                                                                                                                                                                                                    | 2.42 (1.94 to 3.03)   | 1.95 (1.53 to 2.48) |
| Model 4=Model 3+Non-obesity-related morbidity                                                                                                                                                                                                                                        | 2.30 (1.84 to 2.88)   | 1.86 (1.45 to 2.38) |
| Model 5=Model 4+obesity-related morbidity                                                                                                                                                                                                                                            | 1.77 (1.41 to 2.22)   | 1.49 (1.16 to 1.91) |
| Note: Estimates are hazard ratios (HR) with 95% CI per one increase one unit increase in z score of the exposure; except for metabolic disturbance and type 2 diabetes as binary exposures.<br>Weighted for likelihood of being tested for COVID-19 by Inverse Probability Weighting |                       |                     |

**Table S3f. Association between type 2 diabetes and COVID-19 outcomes with sequential adjustments in the UK Biobank study**

| Model and adjustment                                                                                                                                                                                                                                                                 | Unweighted HR(95% CI) | Weighted HR(95% CI) |
|--------------------------------------------------------------------------------------------------------------------------------------------------------------------------------------------------------------------------------------------------------------------------------------|-----------------------|---------------------|
| COVID-19 test                                                                                                                                                                                                                                                                        |                       |                     |
| Model 1=Age and gender                                                                                                                                                                                                                                                               | 2.44 (2.16 to 2.76)   | 1.72 (1.51 to 1.94) |
| Model 2=Model 1+demographics                                                                                                                                                                                                                                                         | 2.05 (1.80 to 2.32)   | 1.56 (1.37 to 1.77) |
| Model 3=Model 2+behavioural risks                                                                                                                                                                                                                                                    | 1.95 (1.72 to 2.22)   | 1.51 (1.33 to 1.71) |
| Model 4=Model 3+Non-obesity-related morbidity                                                                                                                                                                                                                                        | 1.86 (1.63 to 2.11)   | 1.47 (1.29 to 1.68) |
| Model 5=Model 4+obesity-related morbidity                                                                                                                                                                                                                                            | 1.51 (1.33 to 1.72)   | 1.31 (1.15 to 1.50) |
| COVID-19 hospital admission                                                                                                                                                                                                                                                          |                       |                     |
| Model 1=Age and gender                                                                                                                                                                                                                                                               | 2.92 (2.41 to 3.54)   | 2.18 (1.78 to 2.66) |
| Model 2=Model 1+demographics                                                                                                                                                                                                                                                         | 2.30 (1.89 to 2.80)   | 1.86 (1.52 to 2.28) |
| Model 3=Model 2+behavioural risks                                                                                                                                                                                                                                                    | 2.15 (1.76 to 2.63)   | 1.77 (1.44 to 2.17) |
| Model 4=Model 3+Non-obesity-related morbidity                                                                                                                                                                                                                                        | 1.99 (1.63 to 2.43)   | 1.67 (1.35 to 2.05) |
| Model 5=Model 4+obesity-related morbidity                                                                                                                                                                                                                                            | 1.51 (1.23 to 1.85)   | 1.34 (1.09 to 1.66) |
| COVID-19 ICU admission                                                                                                                                                                                                                                                               |                       |                     |
| Model 1=Age and gender                                                                                                                                                                                                                                                               | 2.75 (1.73 to 4.38)   | 2.03 (1.26 to 3.26) |
| Model 2=Model 1+demographics                                                                                                                                                                                                                                                         | 2.15 (1.33 to 3.46)   | 1.71 (1.06 to 2.77) |
| Model 3=Model 2+behavioural risks                                                                                                                                                                                                                                                    | 2.06 (1.27 to 3.34)   | 1.66 (1.02 to 2.70) |
| Model 4=Model 3+Non-obesity-related morbidity                                                                                                                                                                                                                                        | 1.92 (1.18 to 3.12)   | 1.57 (0.96 to 2.57) |
| Model 5=Model 4+obesity-related morbidity                                                                                                                                                                                                                                            | 1.24 (0.76 to 2.02)   | 1.06 (0.64 to 1.75) |
| COVID-19 death                                                                                                                                                                                                                                                                       |                       |                     |
| Model 1=Age and gender                                                                                                                                                                                                                                                               | 3.17 (2.53 to 3.97)   | 2.37 (1.84 to 3.05) |
| Model 2=Model 1+demographics                                                                                                                                                                                                                                                         | 2.65 (2.11 to 3.35)   | 2.07 (1.60 to 2.68) |
| Model 3=Model 2+behavioural risks                                                                                                                                                                                                                                                    | 2.50 (1.98 to 3.16)   | 1.95 (1.51 to 2.52) |
| Model 4=Model 3+Non-obesity-related morbidity                                                                                                                                                                                                                                        | 2.38 (1.88 to 3.01)   | 1.86 (1.44 to 2.41) |
| Model 5=Model 4+obesity-related morbidity                                                                                                                                                                                                                                            | 1.80 (1.42 to 2.28)   | 1.47 (1.13 to 1.91) |
| Note: Estimates are hazard ratios (HR) with 95% CI per one increase one unit increase in z score of the exposure; except for metabolic disturbance and type 2 diabetes as binary exposures.<br>Weighted for likelihood of being tested for COVID-19 by Inverse Probability Weighting |                       |                     |

**Table S4. Associations of adiposity markers with COVID-19 outcomes with correction for regression dilution bias in the UK Biobank study (n=435,504)**

|                                                                                                                                                                                                                                                                                                                                                                                                                                                                                                                                                                    | COVID-19 positive test (N=5566) | COVID-19 hospital admission (N= 567) | COVID-19 ICU admission (N= 107) | COVID-19 death (N=366) |
|--------------------------------------------------------------------------------------------------------------------------------------------------------------------------------------------------------------------------------------------------------------------------------------------------------------------------------------------------------------------------------------------------------------------------------------------------------------------------------------------------------------------------------------------------------------------|---------------------------------|--------------------------------------|---------------------------------|------------------------|
| <b>Exposures</b>                                                                                                                                                                                                                                                                                                                                                                                                                                                                                                                                                   | HR (95% CI)                     | HR (95% CI)                          | HR (95% CI)                     | HR (95% CI)            |
| BMI                                                                                                                                                                                                                                                                                                                                                                                                                                                                                                                                                                | 1.13(1.07-1.19)                 | 1.21(1.11-1.31)                      | 1.38(1.20-1.58)                 | 1.23(1.09-1.39)        |
| FMI                                                                                                                                                                                                                                                                                                                                                                                                                                                                                                                                                                | 1.10(1.00-1.20)                 | 1.23(1.06-1.42)                      | 1.08(0.79-1.48)                 | 1.19(0.97-1.46)        |
| SMMI                                                                                                                                                                                                                                                                                                                                                                                                                                                                                                                                                               | 1.04(0.95-1.13)                 | 0.99(0.87-1.14)                      | 1.27(0.98-1.65)                 | 1.05(0.87-1.26)        |
| WHR                                                                                                                                                                                                                                                                                                                                                                                                                                                                                                                                                                | 1.15(1.07-1.25)                 | 1.31(1.16-1.49)                      | 1.48(1.16-1.90)                 | 1.39(1.16-1.68)        |
| Metabolic disturbance                                                                                                                                                                                                                                                                                                                                                                                                                                                                                                                                              | 1.29(1.14-1.46)                 | 1.52(1.24-1.85)                      | 1.32(0.83-2.10)                 | 1.49(1.16-1.91)        |
| Type 2 diabetes                                                                                                                                                                                                                                                                                                                                                                                                                                                                                                                                                    | 1.31(1.15-1.50)                 | 1.34(1.09-1.66)                      | 1.06(0.64-1.75)                 | 1.47(1.13-1.91)        |
| <p>Note: Estimates are hazard ratios (HR) with 95% CI per one increase in z score of the exposure except for metabolic disturbance and type 2 diabetes as binary exposure.<br/>           Adjusted for demographic factors (age, gender, Townsend index, education), behavioural risk factors (smoking, alcohol consumption, diet and physical activity), non-obesity-related morbidity (COPD, asthma, autoimmune rheumatological conditions, ulcerative colitis and Crohn's disease) and obesity-related morbidity (hypertension, CVD, GORD and sleep apnoea)</p> |                                 |                                      |                                 |                        |

**Figure S1. DAG for the association between BMI, body fat distribution, and conditions caused by metabolic disturbance and incidence of severe COVID-19 outcomes**

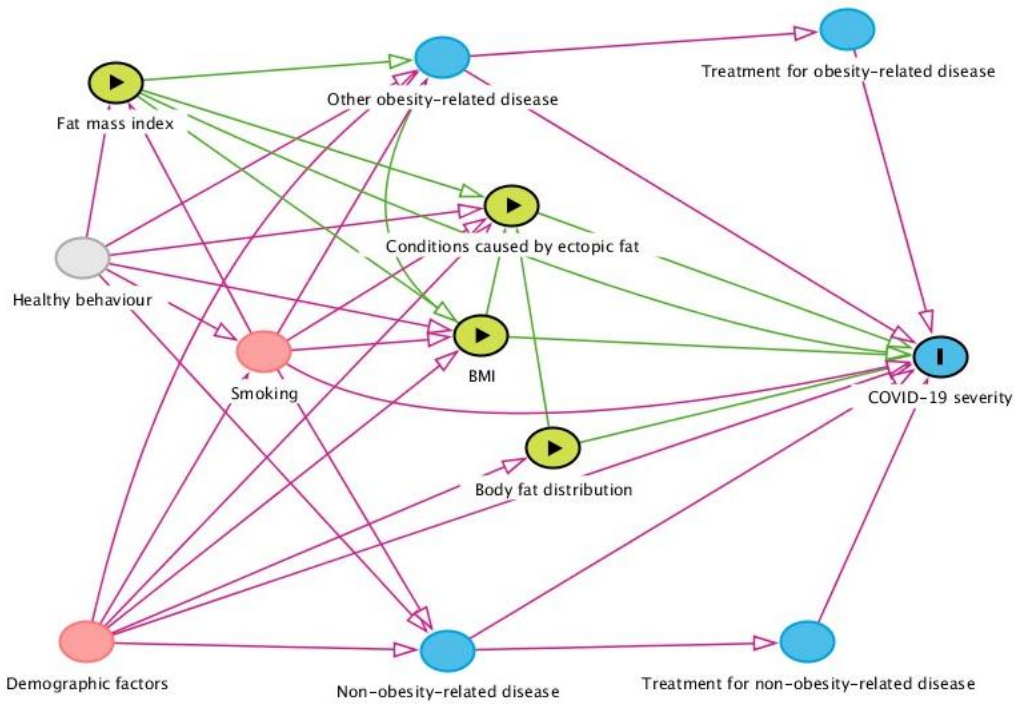

Note: Key- exposures of interest are shown in green, the outcome and direct ancestors of the outcome in blue, unmeasured variables in grey, and other variables in red. Green paths represent the causal paths of interest, while red paths represent biasing paths.

**Figure S2a. Restricted cubic spline models for BMI z scores showing the hazard ratio for its association with COVID-19 outcomes**

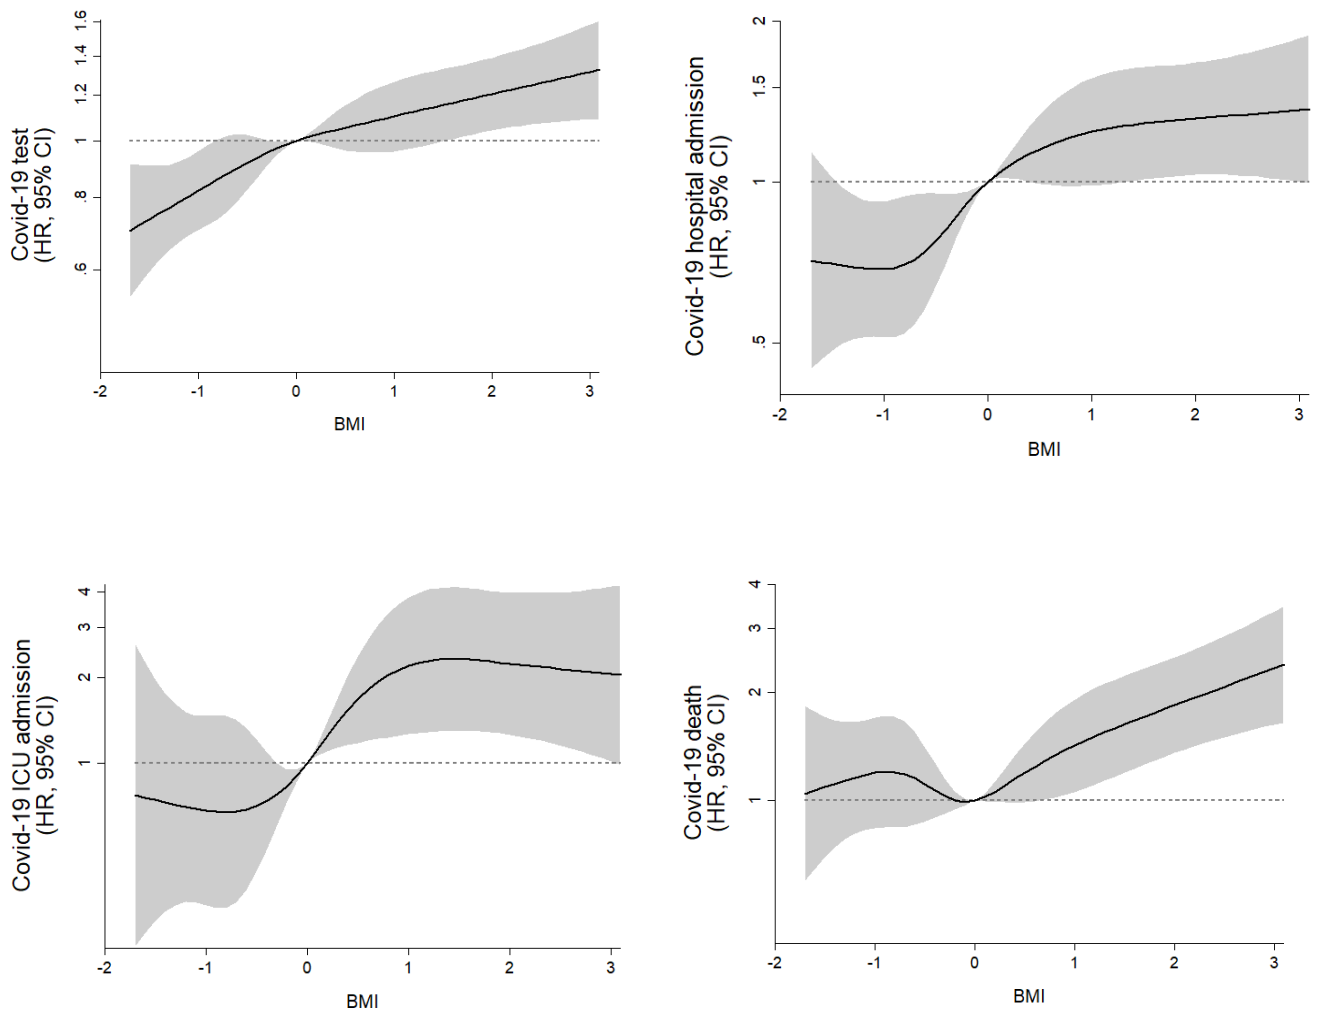

**Note:** The y axis is on a logarithmic scale.

**Figure S2b. Restricted cubic spline models for FMI z scores showing the hazard ratio for its association with COVID-19 outcomes**

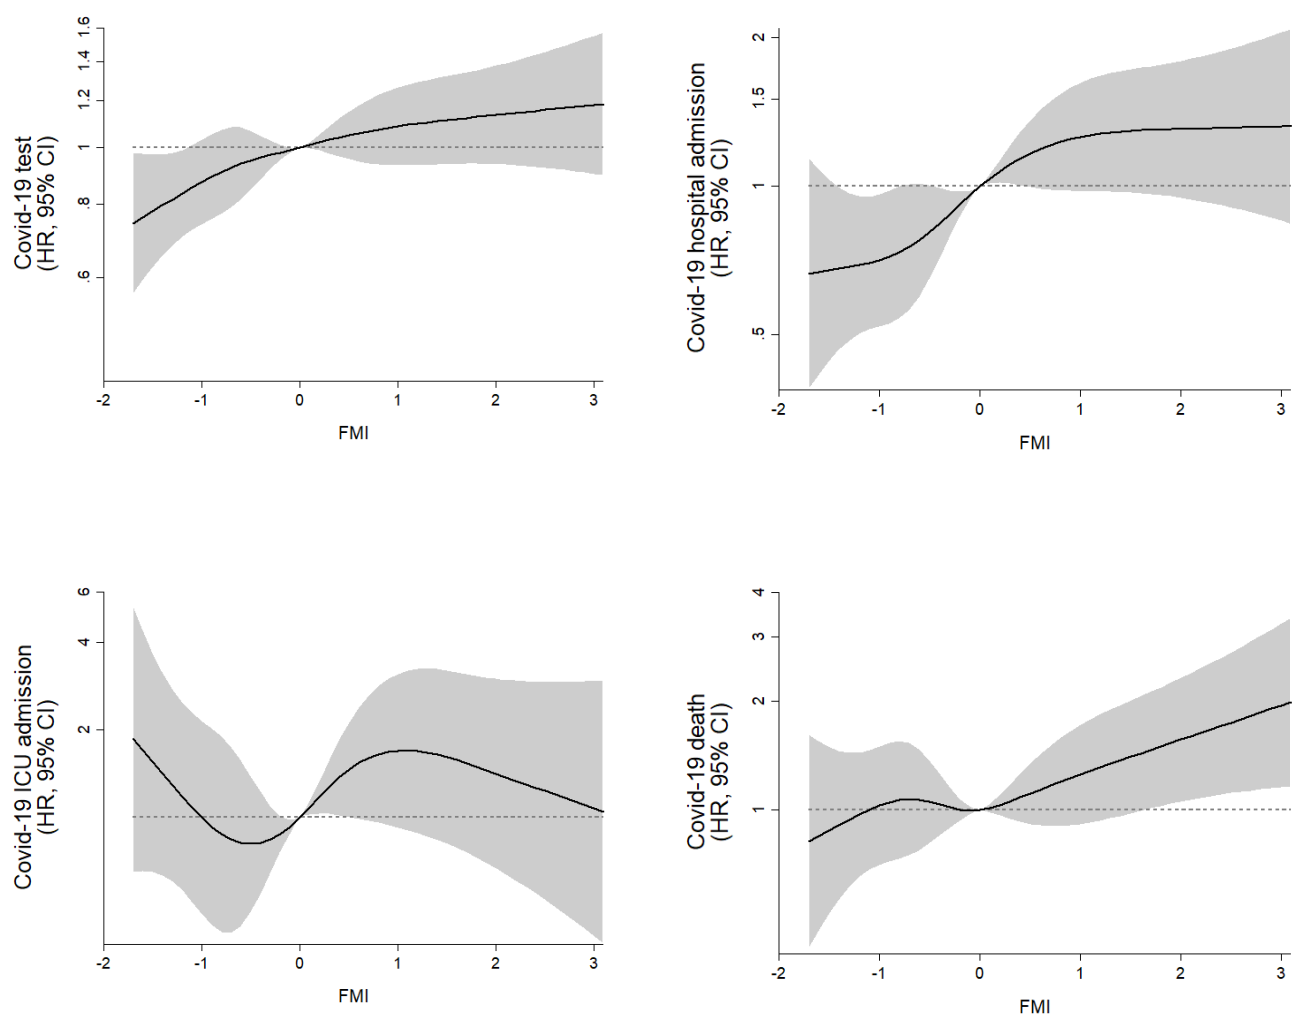

**Note:** The y axis is on a logarithmic scale.



**Figure S2c. Restricted cubic spline models for SMMI z scores showing the hazard ratio for its association with COVID-19 outcomes**

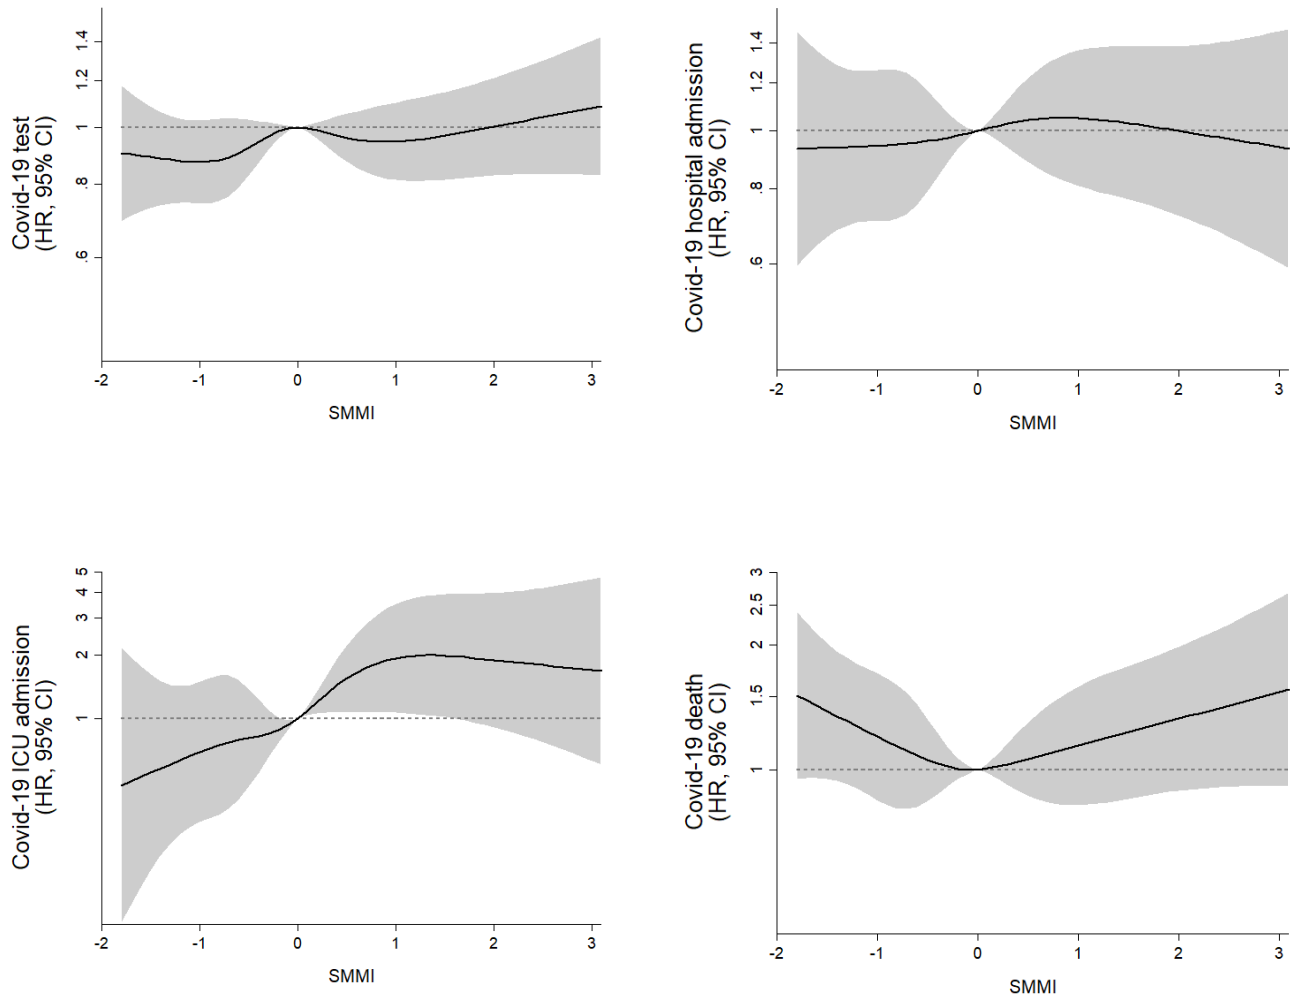

**Note:** The y axis is on a logarithmic scale.

**Figure S2d. Restricted cubic spline models for WHR z scores showing the hazard ratio for its association with COVID-19 outcomes**

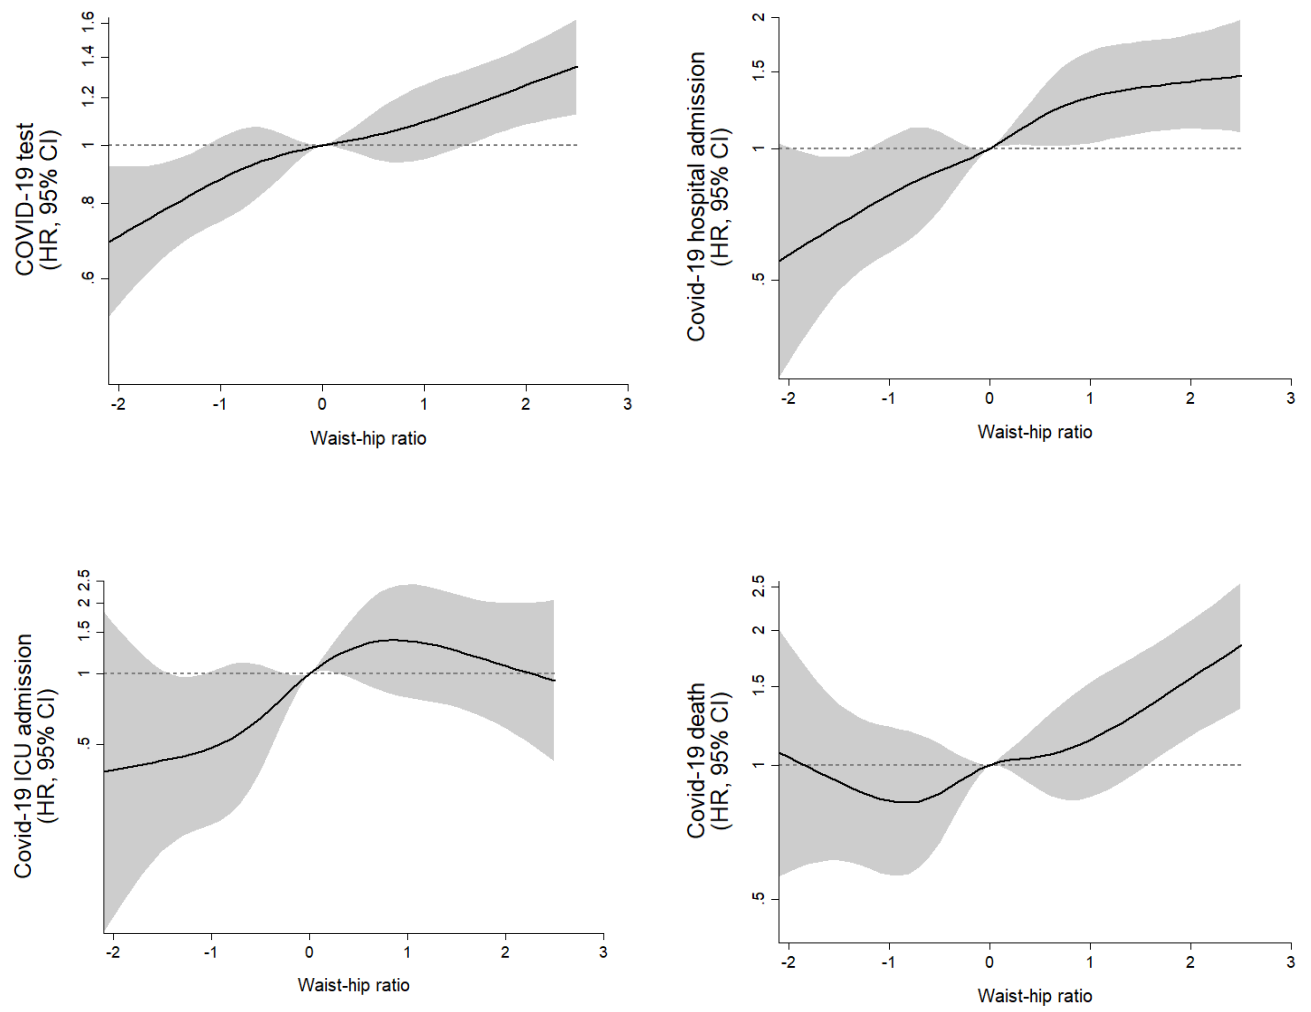

**Note:** The y axis is on a logarithmic scale.

Figure S3a. The causal effect estimates on COVID-19 test across different MR methods

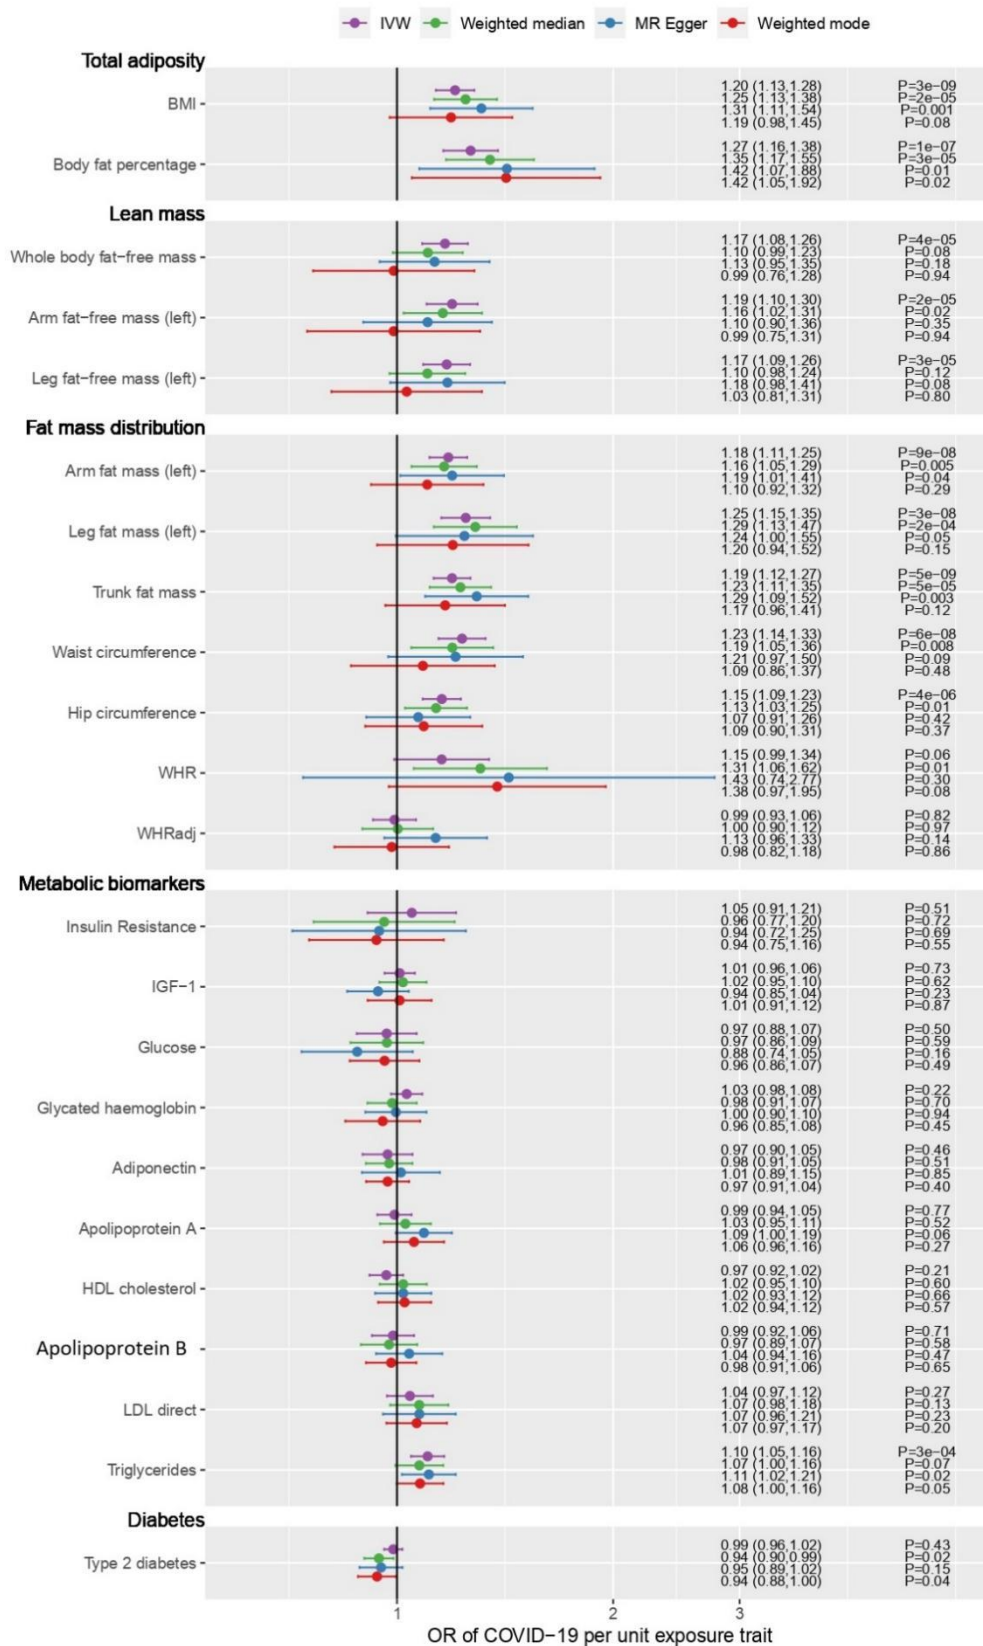

Note: For quantitative traits, the units are OR per SD; for binary traits, the units are OR per log(OR)

**Figure S3b. The causal effect estimates on COVID-19 hospital admission across different MR methods**

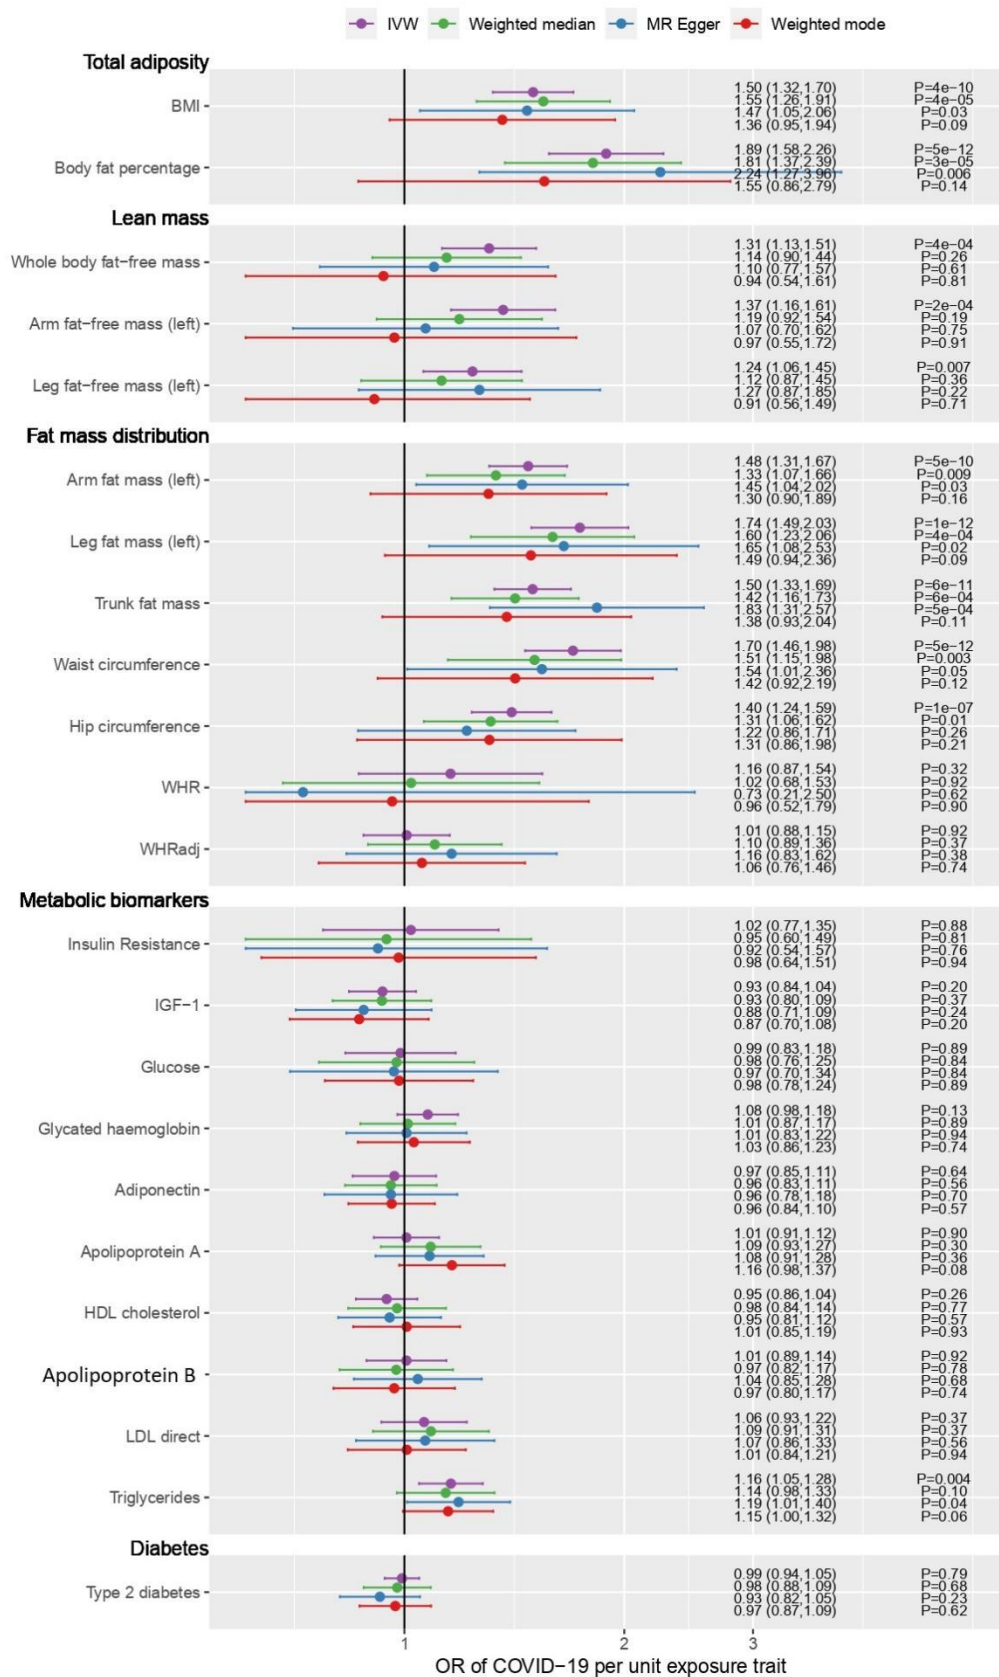

Note: For quantitative traits, the units are OR per SD; for binary traits, the units are OR per log(OR)

**Figure S3c. The causal effect estimates on very severe confirmed COVID-19 across different MR methods**

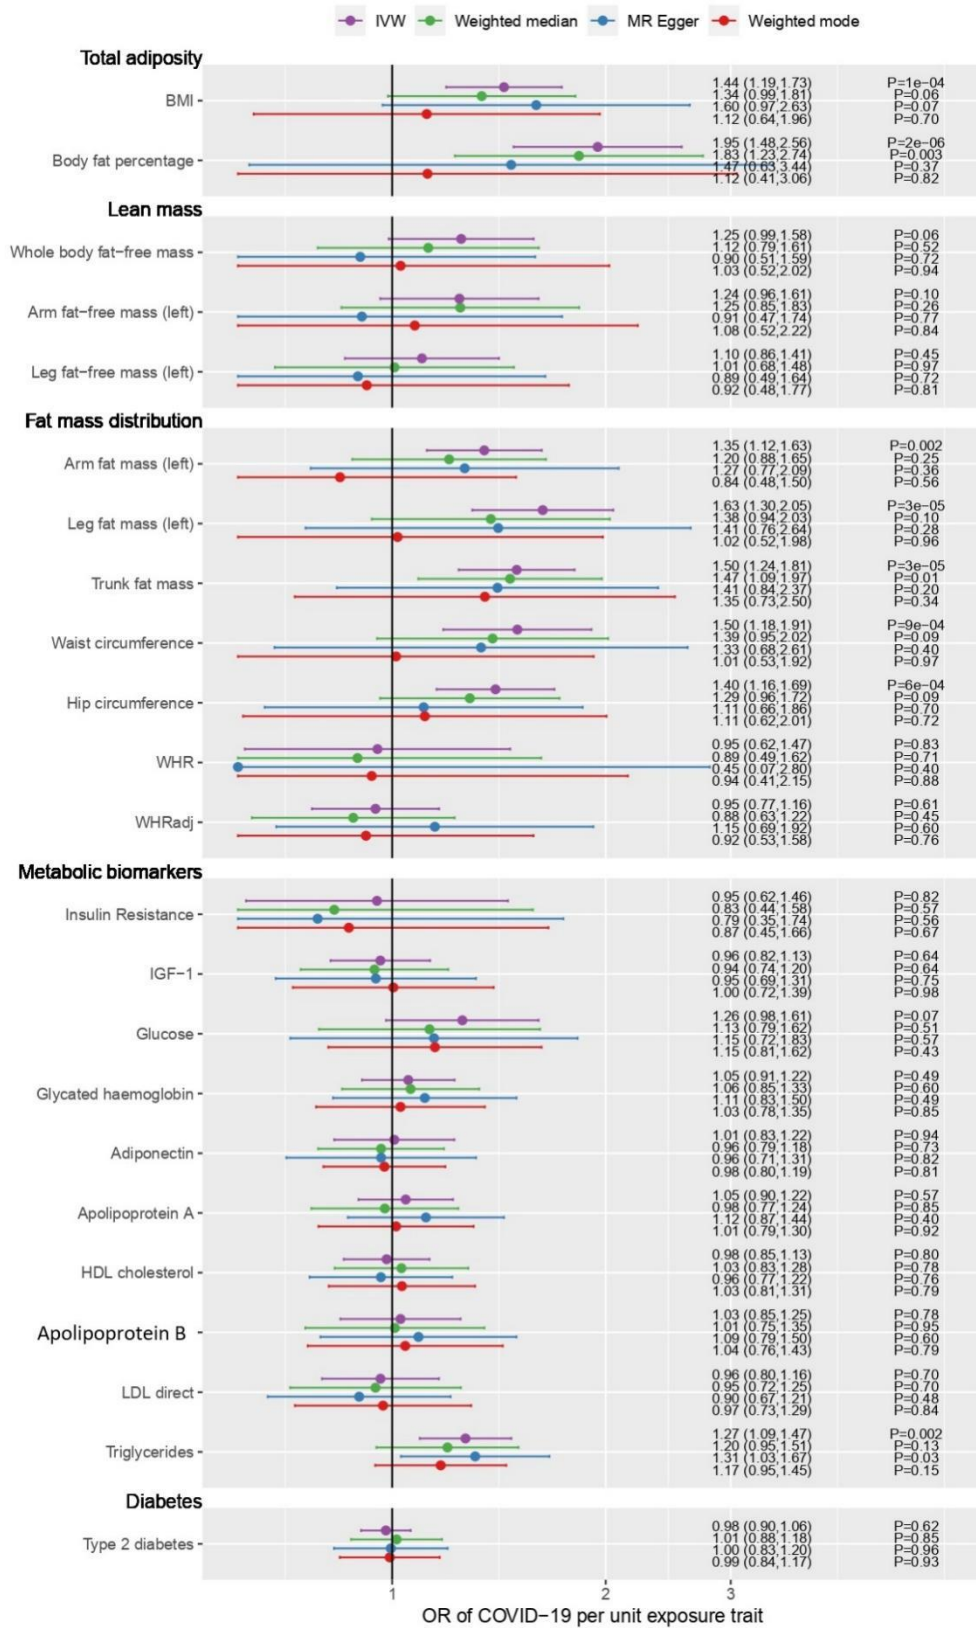

Note: For quantitative traits, the units are OR per SD; for binary traits, the units are OR per log(OR)

**Figure S4a. Effect modification of the associations between BMI and COVID-19 outcomes by age, gender, ethnicity, and cardiovascular disease**

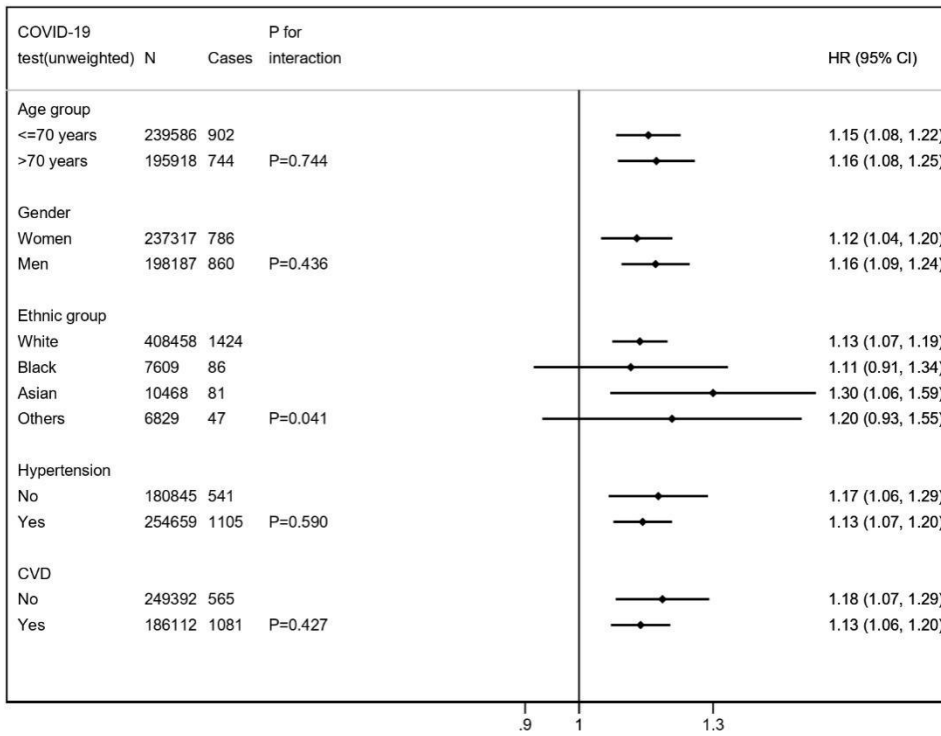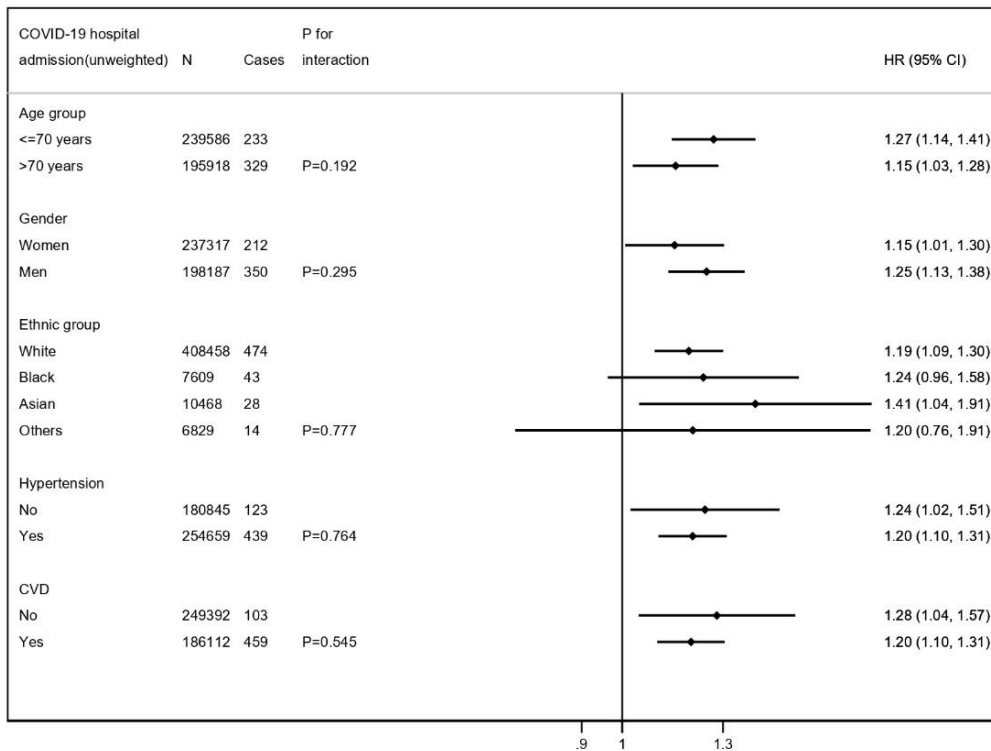

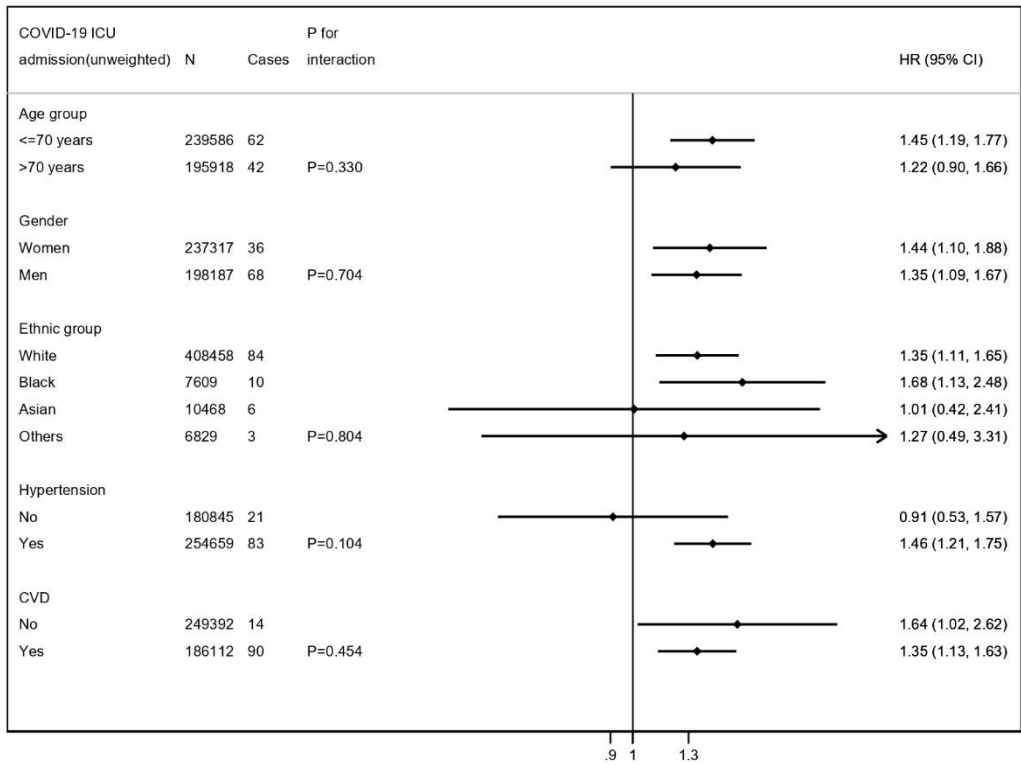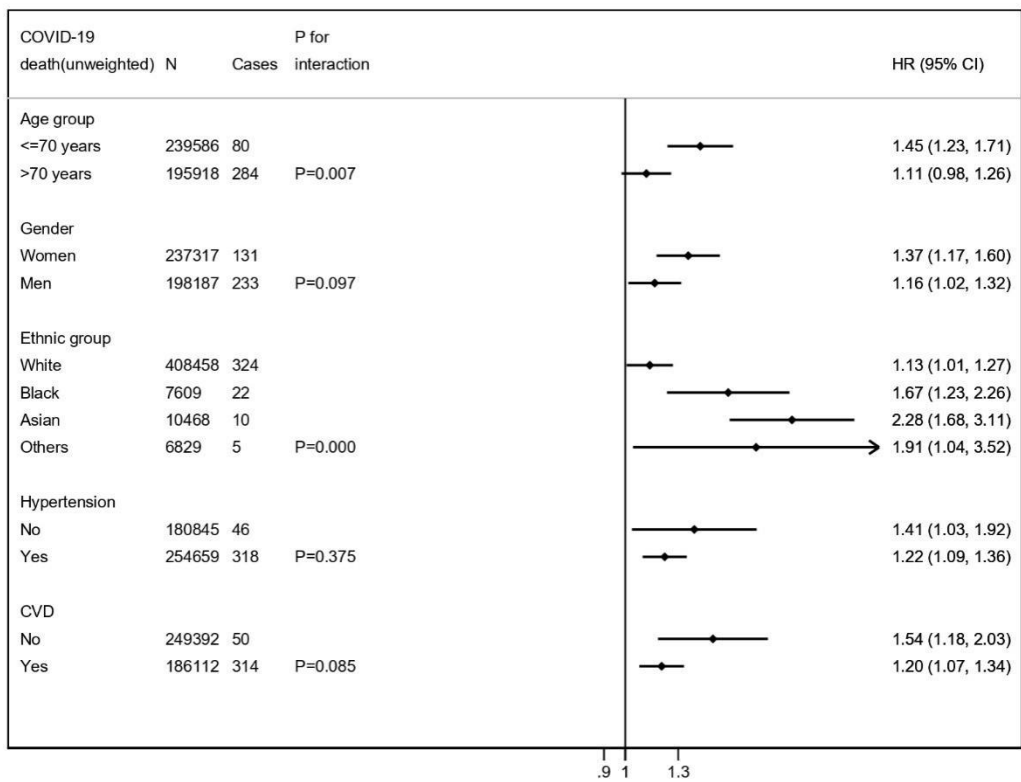

**Figure S4b. Effect modification of the associations between FMI and COVID-19 outcomes by age, gender, ethnicity, and cardiovascular disease**

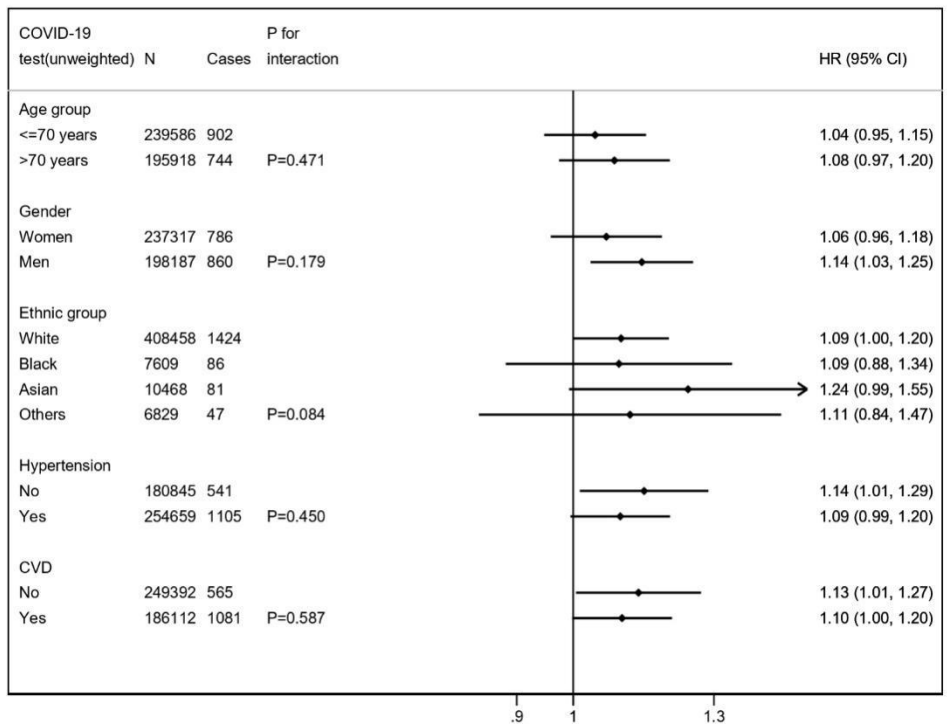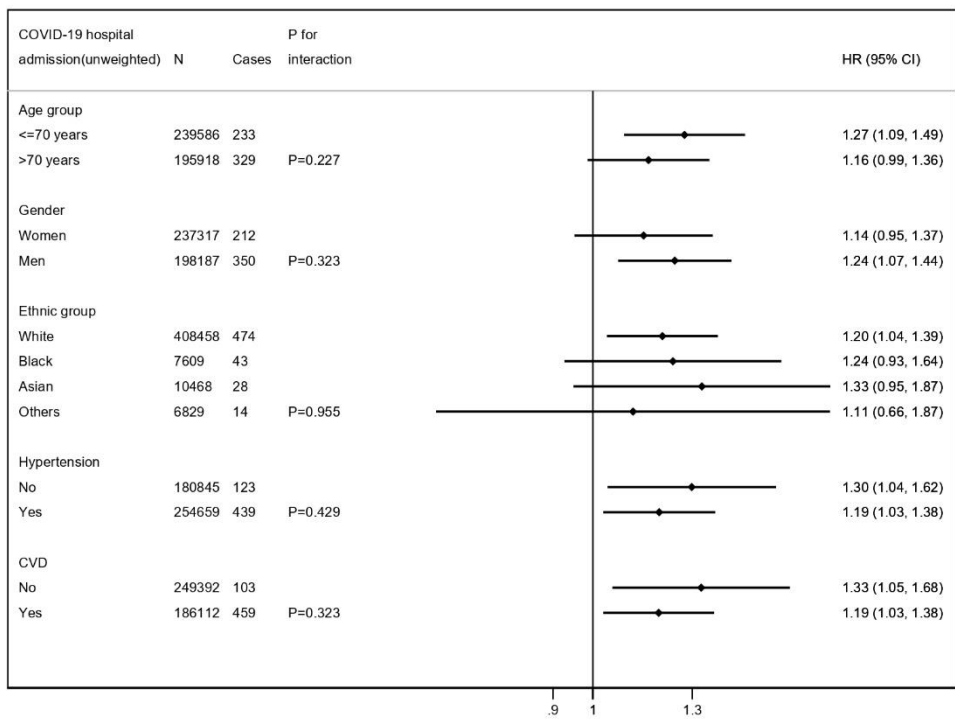



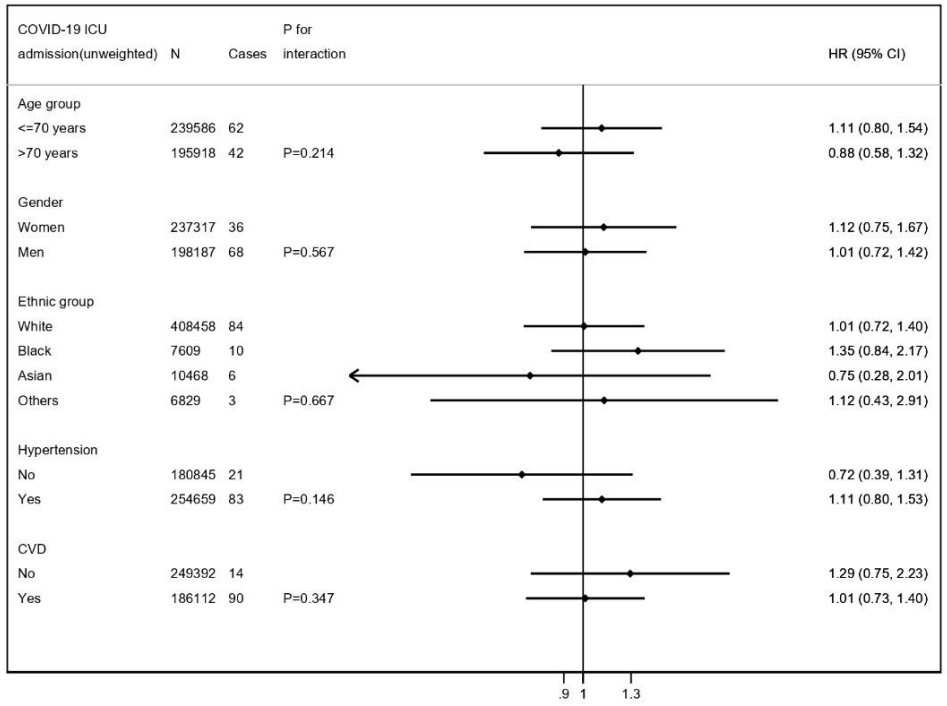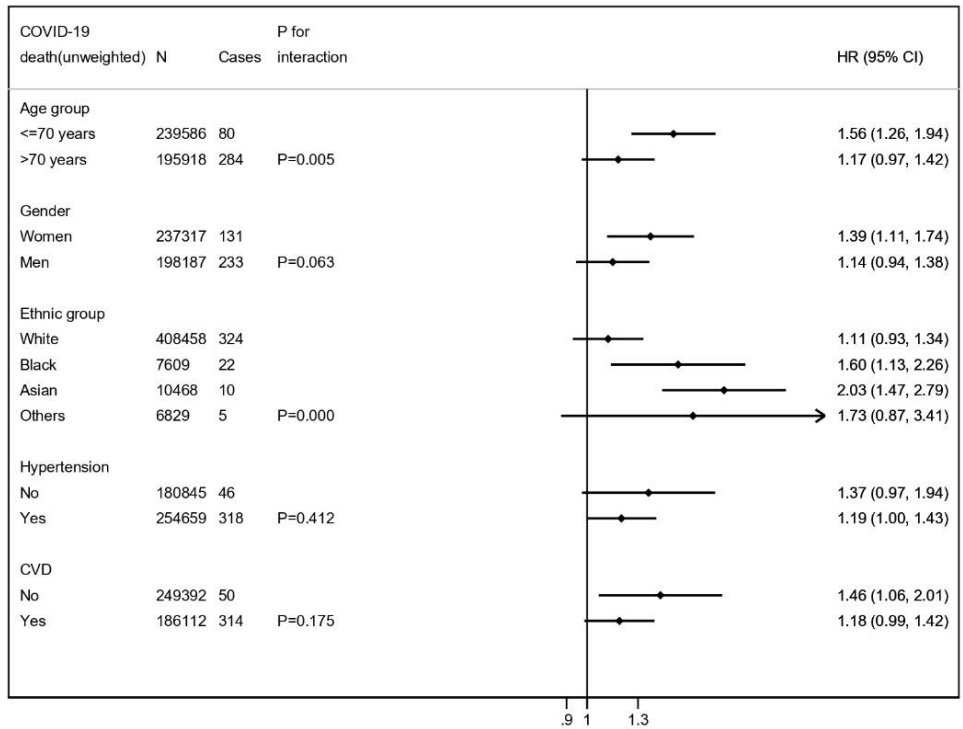

**Figure S4c. Effect modification of the associations between WHR and COVID-19 outcomes by age, gender, ethnicity, and cardiovascular disease**

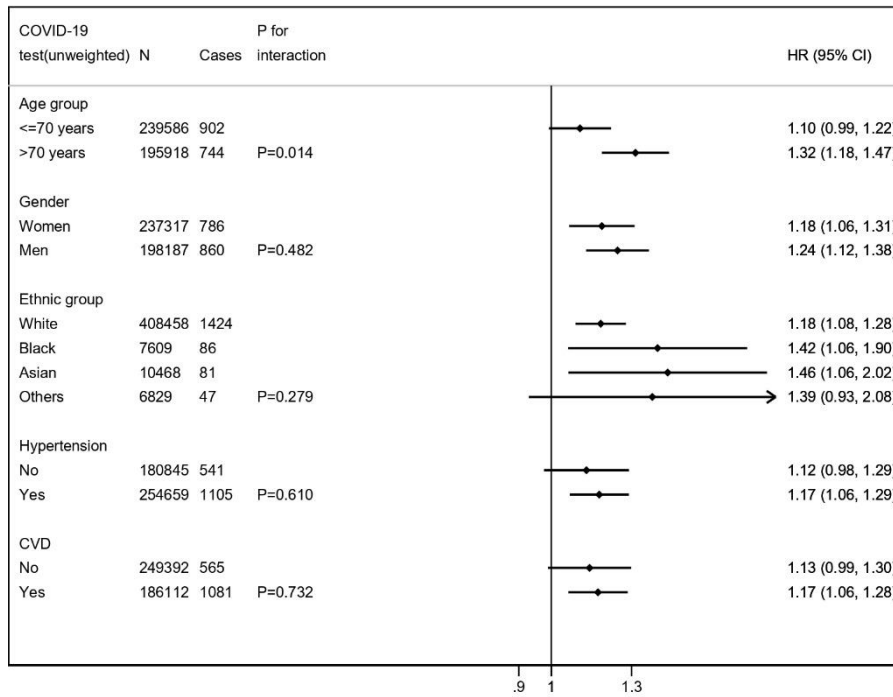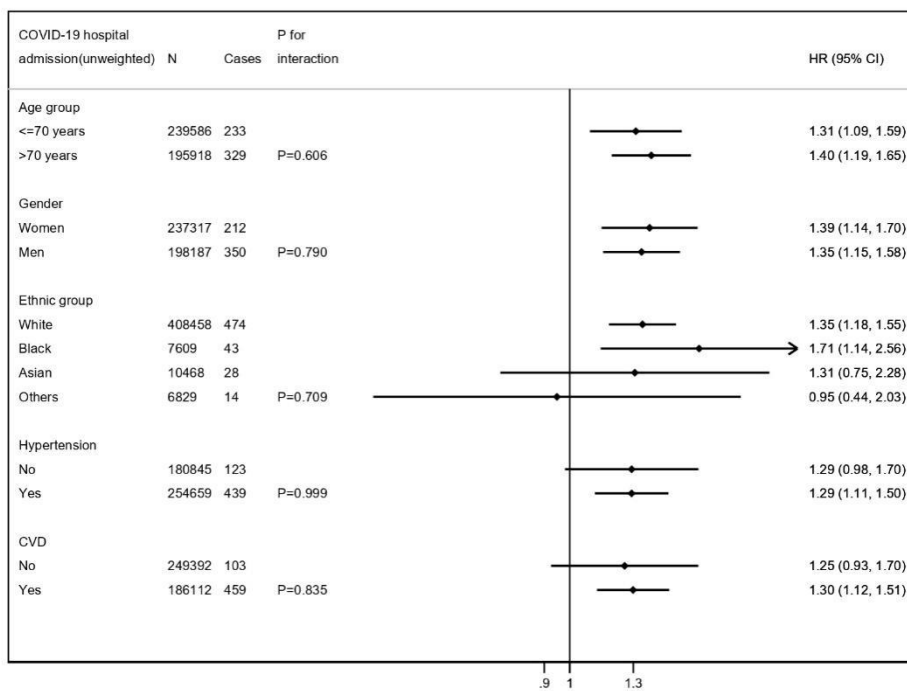

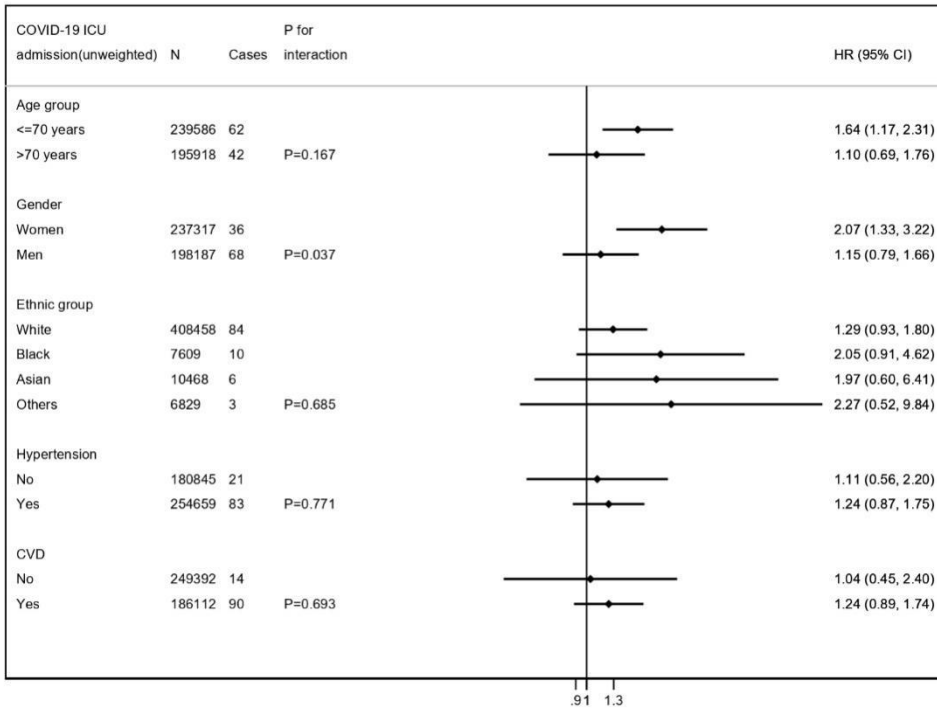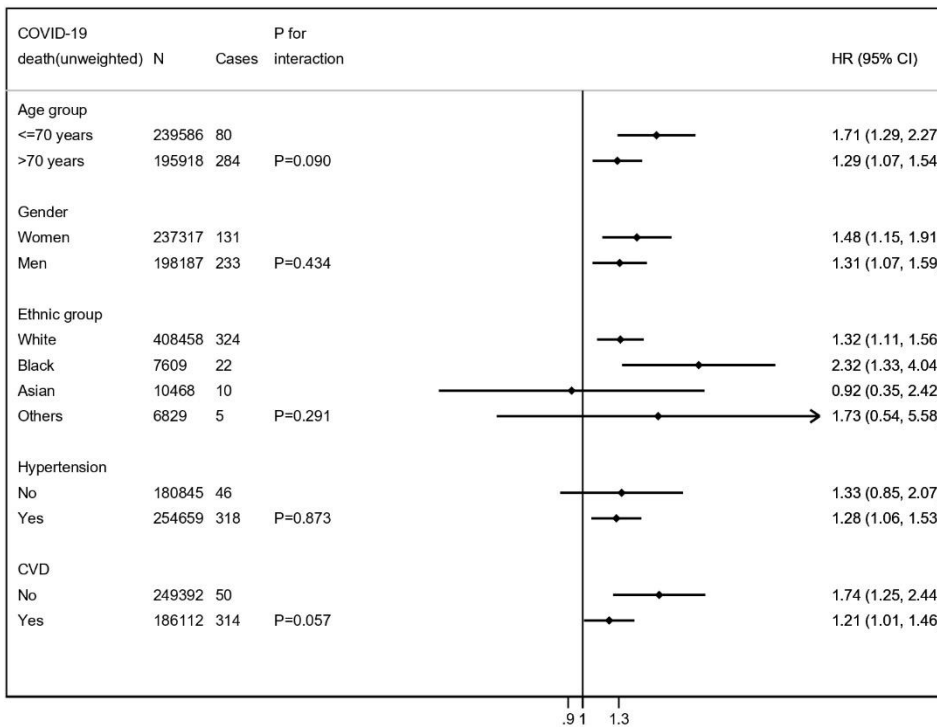

**Figure S4d. Effect modification of the associations between metabolic disturbance and COVID-19 outcomes by age, gender, ethnicity, and cardiovascular disease**

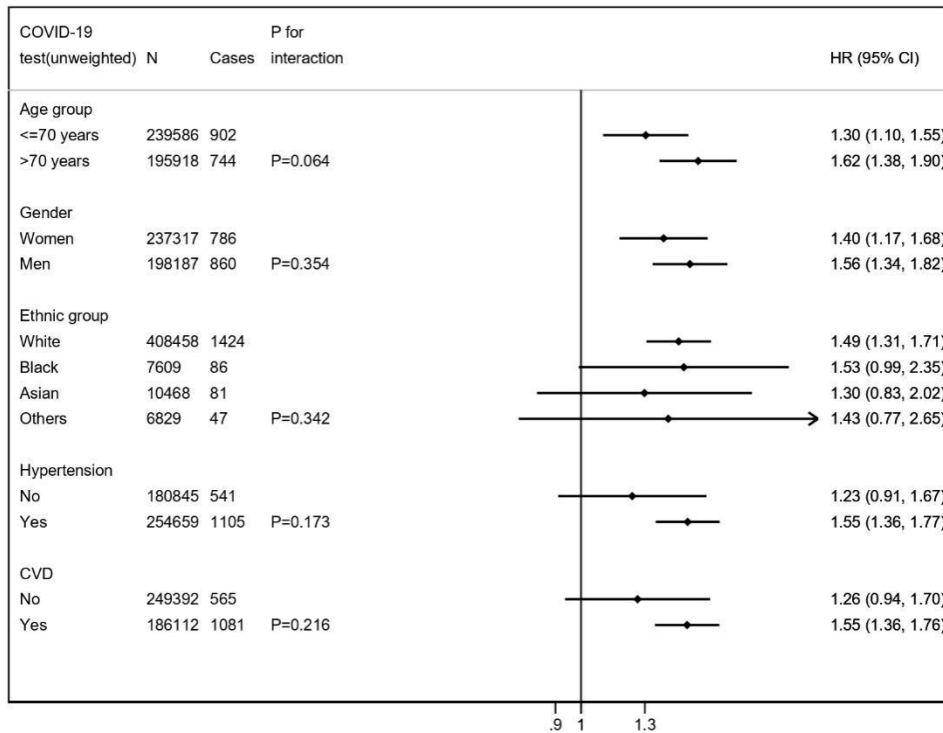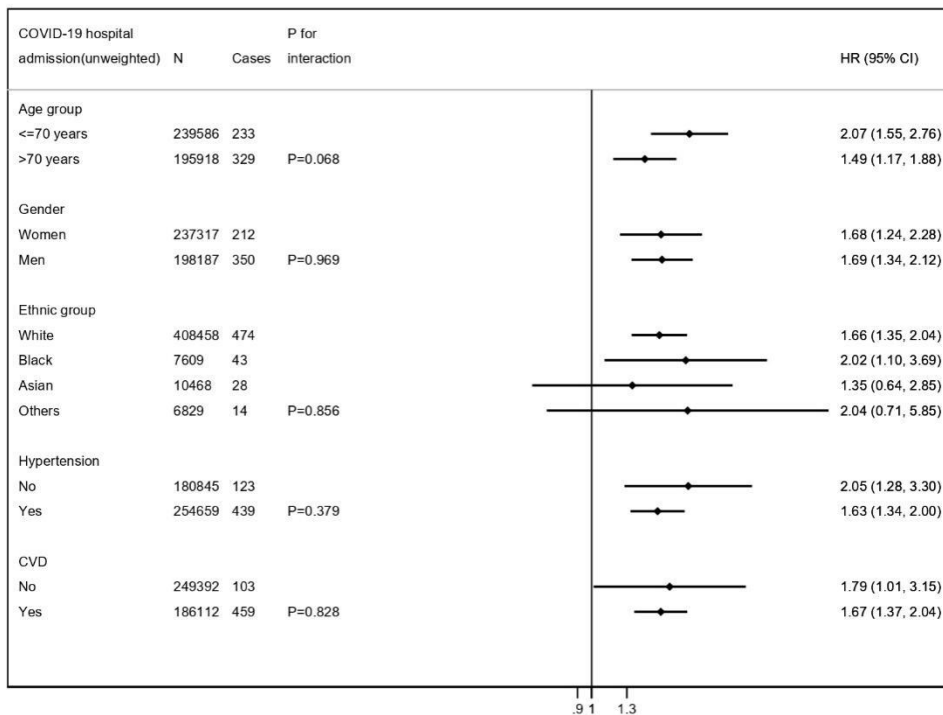

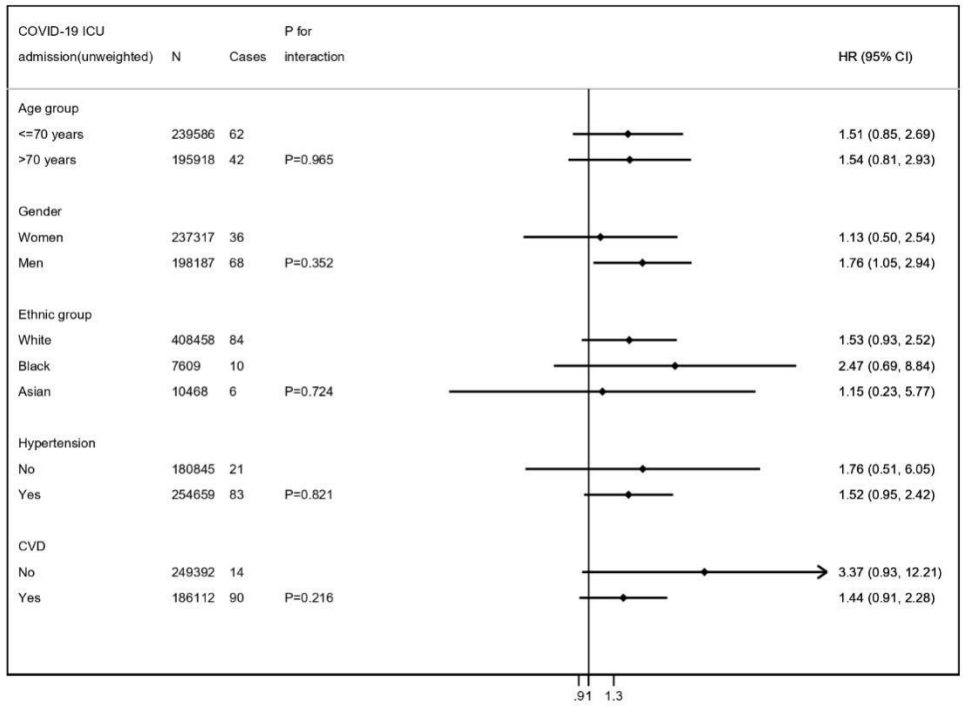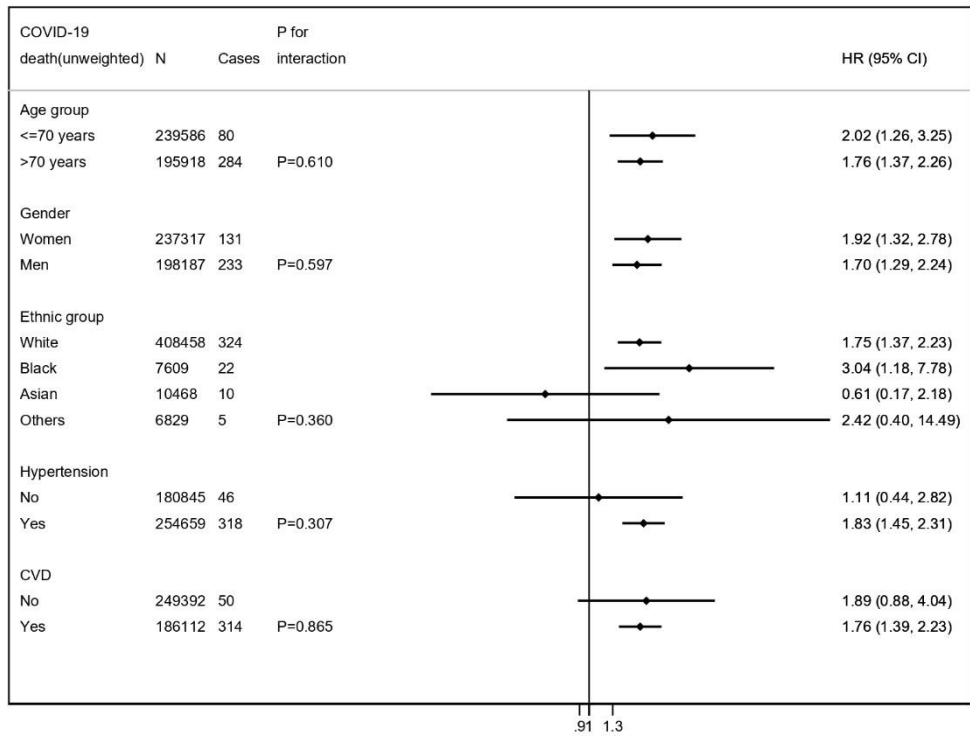

Note: For metabolic disturbance, we did not present people with an ethnicity defined as “others” in analyses of COVID-19 ICU admission because there were only three people with this outcome.

**Figure S4e. Effect modification of the associations between type 2 diabetes and COVID-19 outcomes by age, gender, ethnicity, and cardiovascular disease**

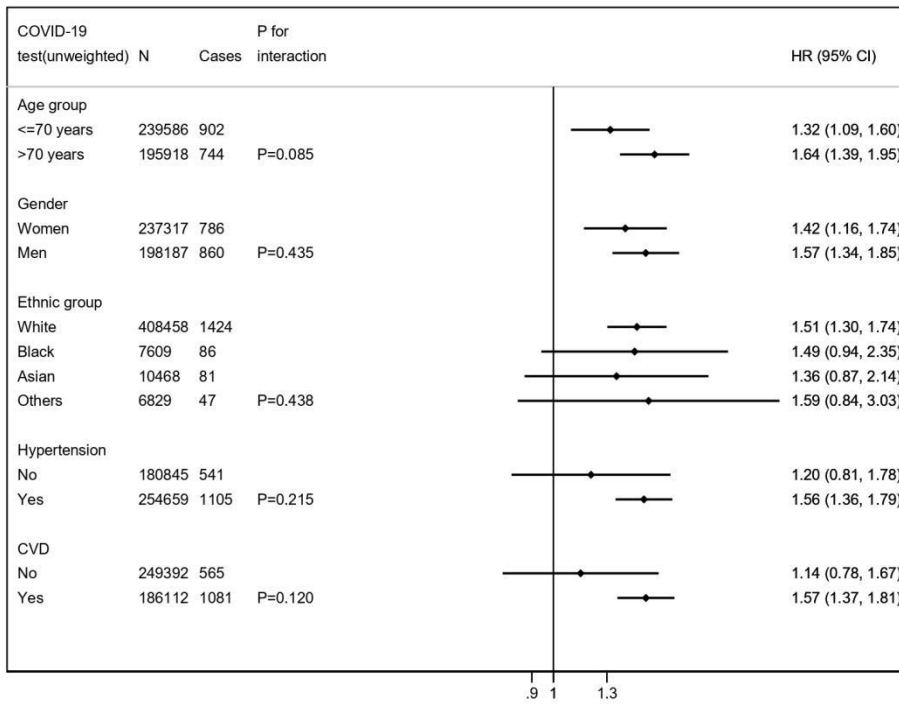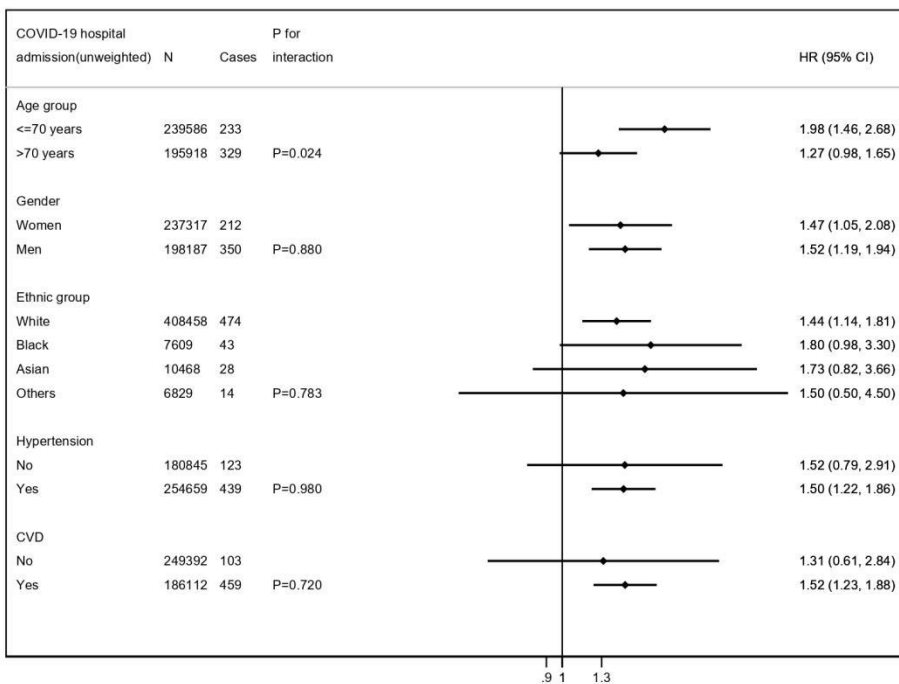

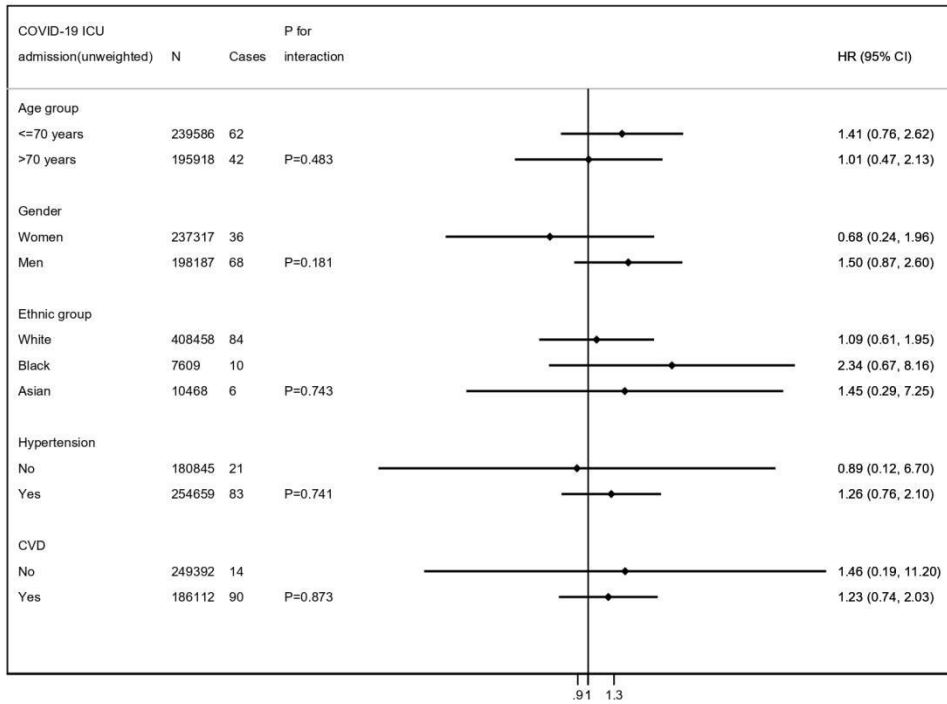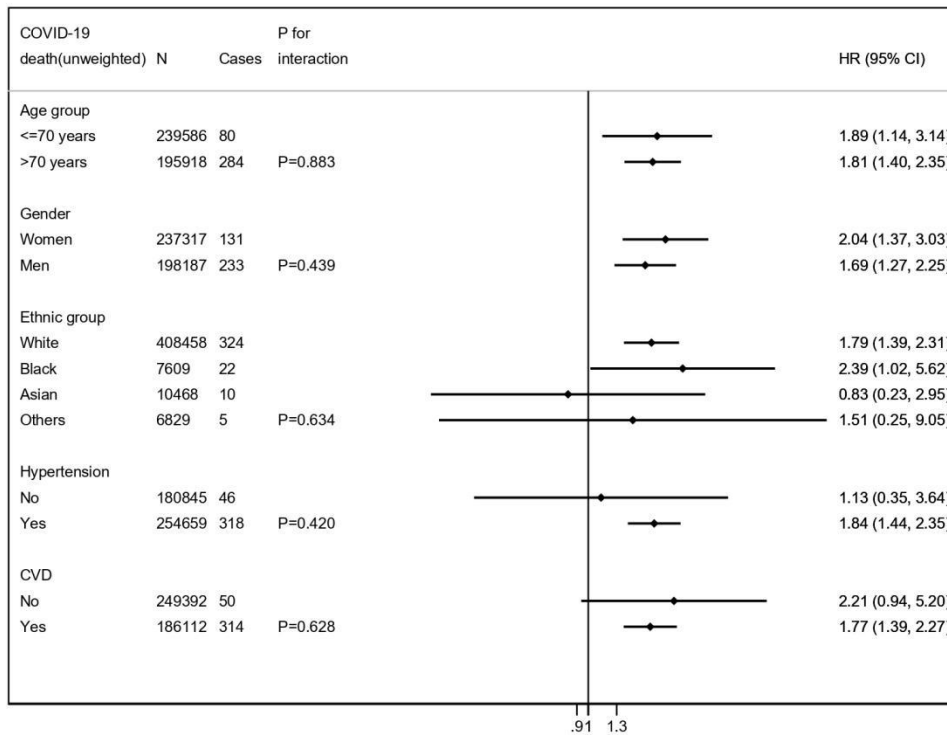

Note: For type 2 diabetes, we did not present people with an ethnicity defined as “others” in analyses of COVID-19 ICU admission because there were only three people with this outcome.

**Figure S5. Multivariable MR analysis assessing the causal effect estimates of BMI with individually adjusting for the risk factors listed on the y-axis.**

The causal effects of BMI are shown for Covid-19 positive (left) and hospitalised Covid-19 (right).

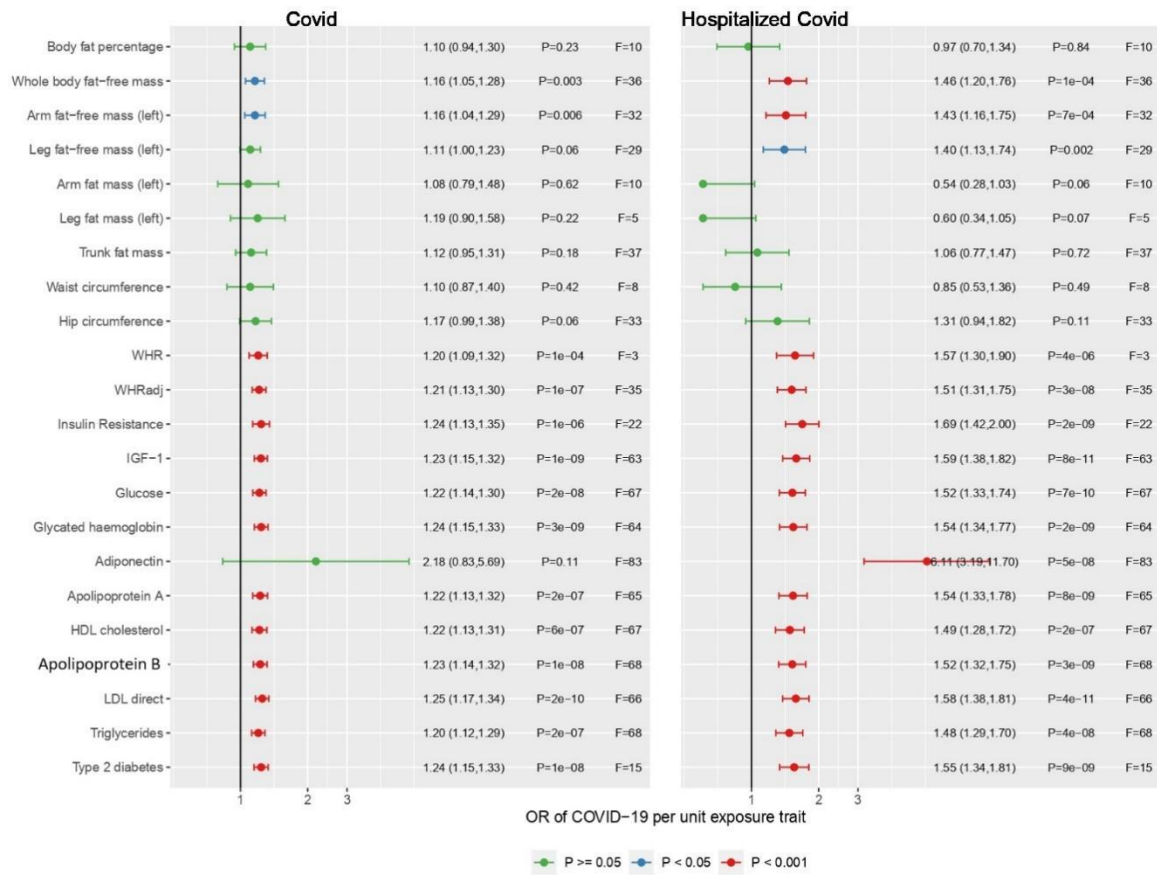

Note: For quantitative traits, the units are OR per SD; for binary traits, the units are OR per log(OR)



**Figure S6. Multivariate MR analysis assessing the comparative causal role of each individual risk factor (listed on the y-axis) on the risk of COVID-19 conditional on body mass index**

The comparative effects are shown for Covid-19 positive (left) and hospitalised Covid-19 (right). The comparative effect estimates from MVMR are further compared to those from univariable MR.

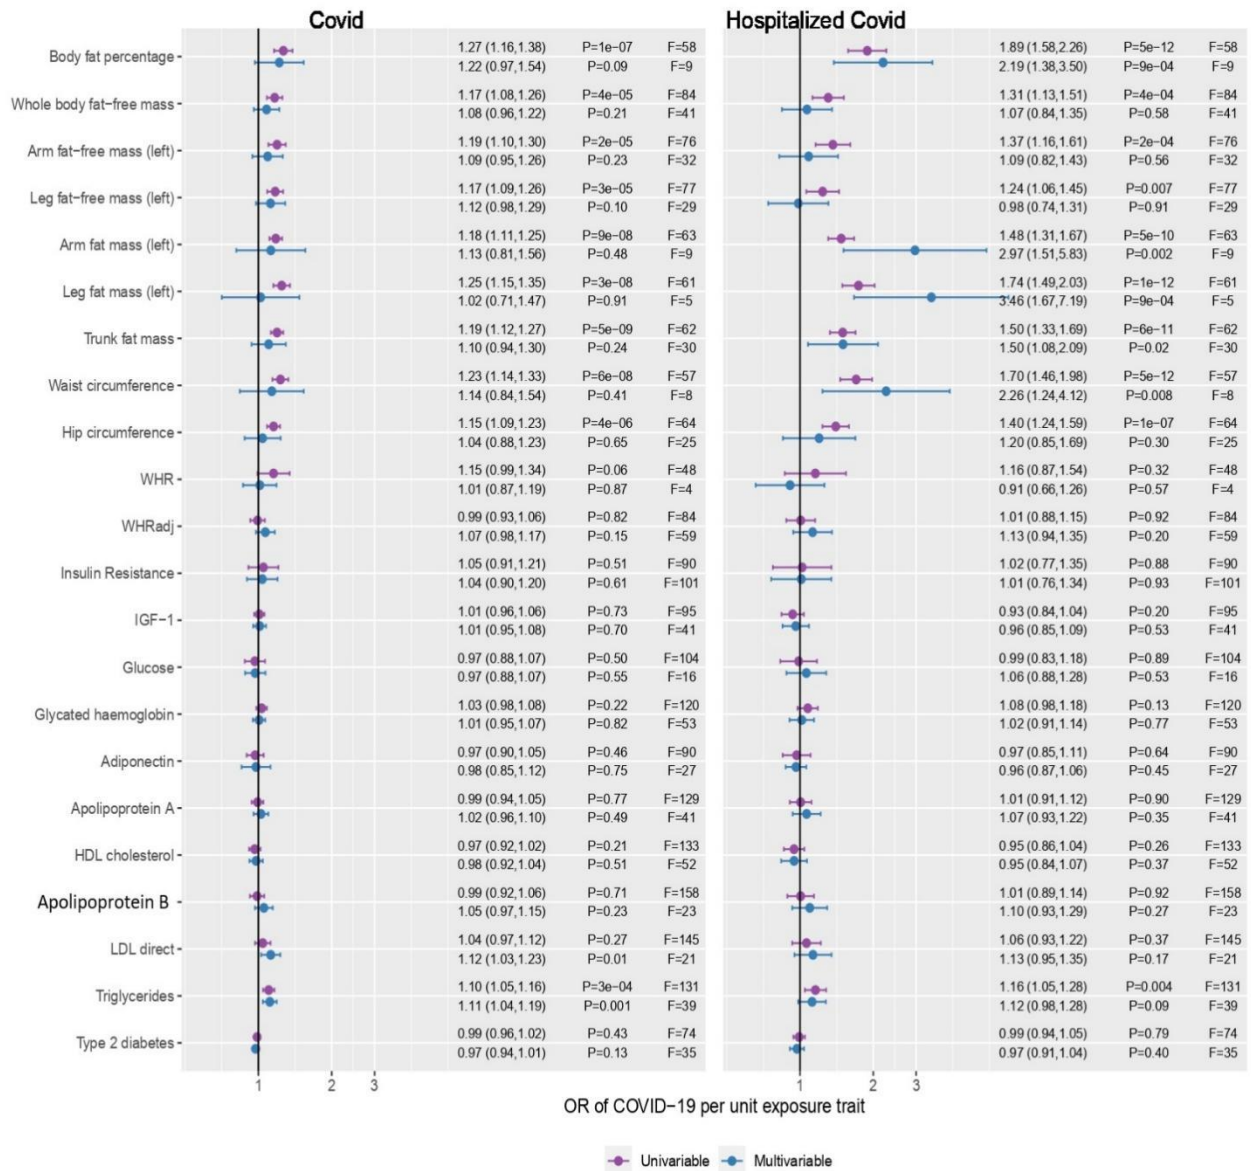

Note: For quantitative traits, the units are OR per SD; for binary traits, the units are OR per log(OR)
